# Supplementary material for: ABAP1 Plays a Role in the Differentiation of Male and Female Gametes in Arabidopsis thaliana
Source: Front Plant Sci. 2021 Feb 10;12:642758. doi: 10.3389/fpls.2021.642758 (PMC7903899; doi:10.3389/fpls.2021.642758)
Supplement: Supplementary Information — Description of detailed experimental procedures. [file Table_1.XLSX]

## Sheet: DEG_FWB_ABAP1OE
Locus Identifier	Gene Model Name	Fold Change	BH	Gene Model Description	Gene Model Type	Primary Gene Symbol	All Gene Symbols
AT2G02490	AT2G02490.1	-5.40037	2.4956e-05	unknown protein; FUNCTIONS IN: molecular_function unknown; INVOLVED IN: biological_process unknown; LOCATED IN: endomembrane system; BEST Arabidopsis thaliana protein match is: unknown protein (TAIR:AT2G02498.1)	protein_coding
AT1G17540	AT1G17540.1	-4.75538	5.4123e-06	Protein kinase protein with adenine nucleotide alpha hydrolases-like domain; FUNCTIONS IN: kinase activity; INVOLVED IN: protein amino acid phosphorylation, response to stress; LOCATED IN: cellular_component unknown; EXPRESSED IN: 9 plant structures; EXPRESSED DURING: L mature pollen stage, M germinated pollen stage, 4 anthesis, C globular stage, petal differentiation and expansion stage; CONTAIN…	protein_coding
AT3G26860	AT3G26860.2	-4.66094	0.0196944	Plant self-incompatibility protein S1 family; FUNCTIONS IN: molecular_function unknown; INVOLVED IN: biological_process unknown; LOCATED IN: endomembrane system; EXPRESSED IN: 9 plant structures; EXPRESSED DURING: L mature pollen stage, M germinated pollen stage, 4 anthesis, C globular stage, petal differentiation and expansion stage; CONTAINS InterPro DOMAIN/s: Plant self-incompatibility S1 (Int…	protein_coding
AT3G11990	AT3G11990.1	-4.65199	0.000149266	FUNCTIONS IN: molecular_function unknown; INVOLVED IN: biological_process unknown; LOCATED IN: endomembrane system; CONTAINS InterPro DOMAIN/s: Protein of unknown function DUF784, Arabidopsis thaliana (InterPro:IPR008502); BEST Arabidopsis thaliana protein match is: downregulated in DIF1 18 (TAIR:AT1G45190.1)	protein_coding
AT1G75870	AT1G75870.1	-4.57385	9.53782e-05	unknown protein	protein_coding
AT1G36340	AT1G36340.1	-4.5224	1.60909e-09	ubiquitin-conjugating enzyme 31 (UBC31); FUNCTIONS IN: ubiquitin-protein ligase activity, small conjugating protein ligase activity; INVOLVED IN: regulation of protein metabolic process, post-translational protein modification; LOCATED IN: vacuole; EXPRESSED IN: pedicel; EXPRESSED DURING: 4 anthesis; CONTAINS InterPro DOMAIN/s: Ubiquitin-conjugating enzyme/RWD-like (InterPro:IPR016135), Ubiquitin…	protein_coding	UBIQUITIN-CONJUGATING ENZYME 31 (UBC31)	UBIQUITIN-CONJUGATING ENZYME 31 (UBC31)
AT1G18990	AT1G18990.1	-4.04211	9.27805e-08	Protein of unknown function, DUF593; FUNCTIONS IN: molecular_function unknown; INVOLVED IN: biological_process unknown; LOCATED IN: endomembrane system; EXPRESSED IN: 9 plant structures; EXPRESSED DURING: L mature pollen stage, M germinated pollen stage, 4 anthesis, C globular stage, petal differentiation and expansion stage; CONTAINS InterPro DOMAIN/s: Protein of unknown function DUF593 (InterPr…	protein_coding
AT1G23350	AT1G23350.1	-4.02425	1.35994e-22	Plant invertase/pectin methylesterase inhibitor superfamily protein; FUNCTIONS IN: enzyme inhibitor activity, pectinesterase inhibitor activity, pectinesterase activity; INVOLVED IN: biological_process unknown; LOCATED IN: endomembrane system; EXPRESSED IN: 9 plant structures; EXPRESSED DURING: L mature pollen stage, M germinated pollen stage, 4 anthesis, C globular stage, petal differentiation a…	protein_coding
AT1G68610	AT1G68610.1	-3.84154	7.18953e-06	Target promoter of the male germline-specific transcription factor DUO1.	protein_coding	PLANT CADMIUM RESISTANCE 11 (PCR11)	PLANT CADMIUM RESISTANCE 11 (PCR11)
AT5G06760	AT5G06760.1	-3.79461	8.69954e-05	Encodes LEA4-5, a member of the Late Embryogenesis Abundant (LEA) proteins which typically accumulate in response to low water availability conditions imposed during development or by the environment. Most of the diverse set of LEA proteins can be grouped according to properties such as high hydrophilicity and high content of glycine or other small amino acids in what has been termed hydrophilins…	protein_coding	LATE EMBRYOGENESIS ABUNDANT 4-5 (LEA4-5)	LATE EMBRYOGENESIS ABUNDANT 4-5 (AtLEA4-5);LATE EMBRYOGENESIS ABUNDANT 4-5 (LEA4-5)
AT5G43300	AT5G43300.1	-3.73192	0.00102927	Encodes a member of the glycerophosphodiester phosphodiesterase (GDPD) family.	protein_coding	GLYCEROPHOSPHODIESTER PHOSPHODIESTERASE 3 (GDPD3)	GLYCEROPHOSPHODIESTER PHOSPHODIESTERASE 3 (GDPD3); (AtGDPD3)
AT1G80470	AT1G80470.1	-3.67311	0.000413417	F-box/RNI-like/FBD-like domains-containing protein; CONTAINS InterPro DOMAIN/s: F-box domain, cyclin-like (InterPro:IPR001810), FBD (InterPro:IPR013596), FBD-like (InterPro:IPR006566), F-box domain, Skp2-like (InterPro:IPR022364), Leucine-rich repeat 2 (InterPro:IPR013101); BEST Arabidopsis thaliana protein match is: F-box/RNI-like/FBD-like domains-containing protein (TAIR:AT1G16930.1)	protein_coding
AT1G44160	AT1G44160.1	-3.64891	2.46898e-11	HSP40/DnaJ peptide-binding protein; FUNCTIONS IN: unfolded protein binding, heat shock protein binding; INVOLVED IN: protein folding; EXPRESSED IN: 13 plant structures; EXPRESSED DURING: L mature pollen stage, M germinated pollen stage, 4 anthesis, C globular stage, petal differentiation and expansion stage; CONTAINS InterPro DOMAIN/s: Molecular chaperone, heat shock protein, Hsp40, DnaJ (InterPr…	protein_coding
AT5G26700	AT5G26700.1	-3.52687	9.54616e-12	RmlC-like cupins superfamily protein; FUNCTIONS IN: manganese ion binding, nutrient reservoir activity; INVOLVED IN: biological_process unknown; LOCATED IN: endomembrane system, apoplast; EXPRESSED IN: 10 plant structures; EXPRESSED DURING: 4 anthesis, C globular stage, petal differentiation and expansion stage; CONTAINS InterPro DOMAIN/s: Cupin, RmlC-type (InterPro:IPR011051), Cupin 1 (InterPro:…	protein_coding
AT1G68620	AT1G68620.1	-3.42973	0.02153	alpha/beta-Hydrolases superfamily protein; FUNCTIONS IN: hydrolase activity; INVOLVED IN: metabolic process; LOCATED IN: cellular_component unknown; EXPRESSED IN: 11 plant structures; EXPRESSED DURING: LP.06 six leaves visible, LP.04 four leaves visible, 4 anthesis, C globular stage, petal differentiation and expansion stage; CONTAINS InterPro DOMAIN/s: Lipase, GDXG, active site (InterPro:IPR0021…	protein_coding
AT1G54870	AT1G54870.1	-3.40881	2.74169e-09	ChlADR is an aldehyde reductase that catalyzes the reduction of the aldehyde carbonyl groups on saturated and alpha,beta-unsaturated aldehydes with more than 5 carbons in vitro. The N-terminal region of this protein directs GFP to the chloroplast where where ChlADR likely helps to maintain the photosynthetic process by detoxifying reactive carbonyls formed during lipid peroxidation. In addition, …	protein_coding
AT3G09550	AT3G09550.1	-3.32532	0.00108228	Ankyrin repeat family protein; CONTAINS InterPro DOMAIN/s: Ankyrin repeat-containing domain (InterPro:IPR020683), Ankyrin repeat (InterPro:IPR002110); BEST Arabidopsis thaliana protein match is: Ankyrin repeat family protein (TAIR:AT3G12360.1)	protein_coding
AT1G20130	AT1G20130.1	-3.32485	1.06862e-09	GDSL-motif esterase/acyltransferase/lipase. Enzyme group with broad substrate specificity that may catalyze acyltransfer or hydrolase reactions with lipid and non-lipid substrates.	protein_coding
AT4G04930	AT4G04930.1	-3.30359	3.61755e-12	Encodes a sphingolipid delta4-desaturase, involved in sphingolipid biosynthesis. Specifically expressed in floral tissues. Knockout mutants were devoid of sphinga-4,8-dienine in floral tissues.	protein_coding	(DES-1-LIKE)	(DES-1-LIKE)
AT3G56180	AT3G56180.1	-3.29212	0.0134446	Protein of unknown function (DUF567); CONTAINS InterPro DOMAIN/s: Protein of unknown function DUF567 (InterPro:IPR007612); BEST Arabidopsis thaliana protein match is: Protein of unknown function (DUF567) (TAIR:AT3G10986.1)	protein_coding
AT2G18340	AT2G18340.1	-3.26237	1.26121e-06	late embryogenesis abundant domain-containing protein / LEA domain-containing protein; FUNCTIONS IN: molecular_function unknown; INVOLVED IN: embryo development ending in seed dormancy; LOCATED IN: endomembrane system; EXPRESSED IN: petal, leaf whorl, sperm cell, male gametophyte, flower; EXPRESSED DURING: L mature pollen stage, M germinated pollen stage, 4 anthesis, petal differentiation and exp…	protein_coding
AT1G55570	AT1G55570.1	-3.22301	1.73135e-12	SKU5 similar 12 (sks12); FUNCTIONS IN: oxidoreductase activity, copper ion binding; INVOLVED IN: oxidation reduction; LOCATED IN: endomembrane system; EXPRESSED IN: 9 plant structures; EXPRESSED DURING: L mature pollen stage, M germinated pollen stage, 4 anthesis, C globular stage, petal differentiation and expansion stage; CONTAINS InterPro DOMAIN/s: Multicopper oxidase, type 3 (InterPro:IPR0117…	protein_coding	SKU5 SIMILAR 12 (sks12)	SKU5 SIMILAR 12 (sks12)
AT5G07410	AT5G07410.1	-3.20458	1.17084e-15	Encodes a pectin methylesterase implicated in the remodeling of pectins in pollen. Its expression is restricted to the male gametophyte (dry pollen, imbibed pollen and pollen tube). Mutants do not display any phenotype in the vegetative tissues. Pollen germination of KO mutant is strongly delayed in vivo and in vitro. Extra calcium restores the wild type phenotype in vitro.	protein_coding	PECTIN METHYLESTERASE 48 (PME48)	PECTIN METHYLESTERASE 48 (PME48); (ATPME48)
AT1G80850	AT1G80850.1	-3.16851	0.0145633	DNA glycosylase superfamily protein; FUNCTIONS IN: DNA-3-methyladenine glycosylase I activity, catalytic activity; INVOLVED IN: DNA repair, base-excision repair; LOCATED IN: cellular_component unknown; EXPRESSED IN: 22 plant structures; EXPRESSED DURING: 13 growth stages; CONTAINS InterPro DOMAIN/s: DNA glycosylase (InterPro:IPR011257), Methyladenine glycosylase (InterPro:IPR005019); BEST Arabido…	protein_coding
AT3G06260	AT3G06260.1	-3.1633	0.0134446	Encodes a protein with putative galacturonosyltransferase activity.	protein_coding	GALACTURONOSYLTRANSFERASE-LIKE 4 (GATL4)	GALACTURONOSYLTRANSFERASE-LIKE 4 (GATL4);GALACTINOL SYNTHASE 9 (GolS9)
AT3G17225	AT3G17225.1	-3.15428	0.0134446	Plant invertase/pectin methylesterase inhibitor superfamily protein; FUNCTIONS IN: enzyme inhibitor activity, pectinesterase inhibitor activity, pectinesterase activity; INVOLVED IN: biological_process unknown; LOCATED IN: endomembrane system; CONTAINS InterPro DOMAIN/s: Pectinesterase inhibitor (InterPro:IPR006501); BEST Arabidopsis thaliana protein match is: invertase/pectin methylesterase inhi…	protein_coding
AT2G07040	AT2G07040.1	-3.1497	1.24957e-05	Pollen receptor kinase. Coexpression of AtPRK2a with AtRopGEF12 resulted in isotropic pollen tube growth.	protein_coding	(PRK2A)	(ATPRK2A); (PRK2A);POLLEN RECEPTOR LIKE KINASE 2 (PRK2); (ATPRK2)
AT3G28780	AT3G28780.1	-3.13056	0.00236498	Protein of unknown function (DUF1216); FUNCTIONS IN: molecular_function unknown; INVOLVED IN: pollen exine formation; LOCATED IN: endomembrane system; EXPRESSED IN: 8 plant structures; EXPRESSED DURING: L mature pollen stage, M germinated pollen stage, 4 anthesis, petal differentiation and expansion stage; CONTAINS InterPro DOMAIN/s: Protein of unknown function DUF1216 (InterPro:IPR009605); BEST …	protein_coding
AT1G13970	AT1G13970.1	-3.12469	4.12982e-20	Protein of unknown function (DUF1336); FUNCTIONS IN: molecular_function unknown; INVOLVED IN: N-terminal protein myristoylation; EXPRESSED IN: 20 plant structures; EXPRESSED DURING: 10 growth stages; CONTAINS InterPro DOMAIN/s: Protein of unknown function DUF1336 (InterPro:IPR009769); BEST Arabidopsis thaliana protein match is: Protein of unknown function (DUF1336) (TAIR:AT3G29180.2)	protein_coding
AT4G36600	AT4G36600.1	-3.12035	1.1303e-05	Late embryogenesis abundant (LEA) protein; CONTAINS InterPro DOMAIN/s: Late embryogenesis abundant protein, group 4 (InterPro:IPR004238); BEST Arabidopsis thaliana protein match is: late embryogenesis abundant domain-containing protein / LEA domain-containing protein (TAIR:AT2G18340.1)	protein_coding
AT3G30280	AT3G30280.1	-3.0978	0.00132084	HXXXD-type acyl-transferase family protein; FUNCTIONS IN: transferase activity, transferring acyl groups other than amino-acyl groups, transferase activity; INVOLVED IN: biological_process unknown; LOCATED IN: cellular_component unknown; CONTAINS InterPro DOMAIN/s: Transferase (InterPro:IPR003480); BEST Arabidopsis thaliana protein match is: HXXXD-type acyl-transferase family protein (TAIR:AT4G15…	protein_coding
AT4G13450	AT4G13450.1	-3.0636	0.000196085	Adenine nucleotide alpha hydrolases-like superfamily protein; BEST Arabidopsis thaliana protein match is: Adenine nucleotide alpha hydrolases-like superfamily protein (TAIR:AT2G03720.1)	protein_coding
AT1G11250	AT1G11250.1	-3.03895	0.000106317	member of SYP12 Gene Family	protein_coding	SYNTAXIN OF PLANTS 125 (SYP125)	SYNTAXIN OF PLANTS 125 (SYP125); (ATSYP125)
AT1G31750	AT1G31750.1	-3.03723	0.00073829	proline-rich family protein; BEST Arabidopsis thaliana protein match is: glycine-rich protein (TAIR:AT2G04063.1)	protein_coding
AT1G78460	AT1G78460.1	-3.03329	2.36378e-10	SOUL heme-binding family protein; FUNCTIONS IN: binding; INVOLVED IN: biological_process unknown; LOCATED IN: endomembrane system; EXPRESSED IN: 21 plant structures; EXPRESSED DURING: 13 growth stages; CONTAINS InterPro DOMAIN/s: SOUL haem-binding protein (InterPro:IPR006917); BEST Arabidopsis thaliana protein match is: SOUL heme-binding family protein (TAIR:AT1G17100.1)	protein_coding
AT5G46770	AT5G46770.1	-3.01895	3.00769e-07	unknown protein	protein_coding
AT5G36260	AT5G36260.1	-3.00913	0.000154163	Eukaryotic aspartyl protease family protein; FUNCTIONS IN: aspartic-type endopeptidase activity; INVOLVED IN: proteolysis; LOCATED IN: anchored to membrane; EXPRESSED IN: 7 plant structures; EXPRESSED DURING: L mature pollen stage, M germinated pollen stage, 4 anthesis, petal differentiation and expansion stage; CONTAINS InterPro DOMAIN/s: Peptidase aspartic (InterPro:IPR021109), Peptidase aspart…	protein_coding	(A36)	(A36)
AT2G01240	AT2G01240.1	-3.00594	0.000705767	Reticulon family protein; INVOLVED IN: biological_process unknown; LOCATED IN: endoplasmic reticulum; CONTAINS InterPro DOMAIN/s: Reticulon (InterPro:IPR003388); BEST Arabidopsis thaliana protein match is: VIRB2-interacting protein 2 (TAIR:AT4G11220.1)	protein_coding
AT3G13400	AT3G13400.1	-2.9708	2.15634e-08	SKU5 similar 13 (sks13); FUNCTIONS IN: oxidoreductase activity, copper ion binding; INVOLVED IN: oxidation reduction; LOCATED IN: endomembrane system; EXPRESSED IN: 11 plant structures; EXPRESSED DURING: L mature pollen stage, M germinated pollen stage, 4 anthesis, C globular stage, petal differentiation and expansion stage; CONTAINS InterPro DOMAIN/s: Multicopper oxidase, type 3 (InterPro:IPR011…	protein_coding	SKU5 SIMILAR 13 (sks13)	SKU5 SIMILAR 13 (sks13)
AT4G11760	AT4G11760.1	-2.94256	9.53115e-09	Encodes a member of a family of small,secreted, cysteine rich protein with sequence similarity to the PCP (pollen coat protein) gene family.	protein_coding	LOW-MOLECULAR-WEIGHT CYSTEINE-RICH 17 (LCR17)	LOW-MOLECULAR-WEIGHT CYSTEINE-RICH 17 (LCR17)
AT4G27110	AT4G27110.1	-2.934	0.0093	COBRA-like protein 11 precursor (COBL11); CONTAINS InterPro DOMAIN/s: Glycosyl-phosphatidyl inositol-anchored, plant (InterPro:IPR006918); BEST Arabidopsis thaliana protein match is: COBRA-like protein 10 precursor (TAIR:AT3G20580.1)	protein_coding	COBRA-LIKE PROTEIN 11 PRECURSOR (COBL11)	COBRA-LIKE PROTEIN 11 PRECURSOR (COBL11)
AT2G18080	AT2G18080.1	-2.93378	0.00236498	embryo sac development arrest 2 (EDA2); FUNCTIONS IN: serine-type peptidase activity; INVOLVED IN: proteolysis, megagametogenesis; LOCATED IN: endomembrane system; EXPRESSED IN: male gametophyte, flower, pollen tube; EXPRESSED DURING: L mature pollen stage, M germinated pollen stage, 4 anthesis; CONTAINS InterPro DOMAIN/s: Peptidase S28 (InterPro:IPR008758); BEST Arabidopsis thaliana protein matc…	protein_coding	EMBRYO SAC DEVELOPMENT ARREST 2 (EDA2)	EMBRYO SAC DEVELOPMENT ARREST 2 (EDA2)
AT4G39670	AT4G39670.1	-2.92068	4.33211e-11	Glycolipid transfer protein (GLTP) family protein; FUNCTIONS IN: glycolipid transporter activity, glycolipid binding; INVOLVED IN: glycolipid transport; LOCATED IN: cytoplasm; EXPRESSED IN: 16 plant structures; EXPRESSED DURING: 10 growth stages; CONTAINS InterPro DOMAIN/s: Glycolipid transfer protein, GLTP (InterPro:IPR014830); BEST Arabidopsis thaliana protein match is: Glycolipid transfer prot…	protein_coding
AT2G07560	AT2G07560.1	-2.90539	4.06471e-06	H(+)-ATPase 6 (HA6); FUNCTIONS IN: protein binding, ATPase activity; INVOLVED IN: cation transport, metabolic process, ATP biosynthetic process; LOCATED IN: plasma membrane, membrane; EXPRESSED IN: 11 plant structures; EXPRESSED DURING: L mature pollen stage, M germinated pollen stage, 4 anthesis, petal differentiation and expansion stage; CONTAINS InterPro DOMAIN/s: ATPase, P-type, ATPase-associ…	protein_coding	H(+)-ATPASE 6 (HA6)	H(+)-ATPASE 6 (AHA6);H(+)-ATPASE 6 (HA6)
AT2G16750	AT2G16750.1	-2.88833	5.02047e-06	Protein kinase protein with adenine nucleotide alpha hydrolases-like domain; FUNCTIONS IN: protein serine/threonine kinase activity, protein kinase activity, kinase activity, ATP binding; INVOLVED IN: protein amino acid phosphorylation; LOCATED IN: endomembrane system; EXPRESSED IN: 18 plant structures; EXPRESSED DURING: 11 growth stages; CONTAINS InterPro DOMAIN/s: Protein kinase, catalytic doma…	protein_coding
AT1G26320	AT1G26320.1	-2.88321	0.00236498	Zinc-binding dehydrogenase family protein; FUNCTIONS IN: oxidoreductase activity, binding, catalytic activity, zinc ion binding; INVOLVED IN: response to oxidative stress; EXPRESSED IN: 7 plant structures; EXPRESSED DURING: L mature pollen stage, M germinated pollen stage, 4 anthesis, petal differentiation and expansion stage; CONTAINS InterPro DOMAIN/s: GroES-like (InterPro:IPR011032), NAD(P)-bi…	protein_coding
AT3G10890	AT3G10890.1	-2.883	2.04659e-06	Encodes an endo beta mannanase that is localized to the apoplast and involved in glutathione mediated cadmium tolerance.	protein_coding	ENDO-BETA-MANNANASE 3 (MAN3)	ENDO-BETA-MANNANASE 3 (MAN3);XVE SYSTEM-INDUCED CADMIUM-TOLERANCE 1 (XCD1)
AT1G51410	AT1G51410.1	-2.88043	4.59314e-06	similar to Eucalyptus gunnii alcohol dehydrogenase of unknown physiological function (GI:1143445), apple tree, PIR:T16995; NOT a cinnamyl-alcohol dehydrogenase	protein_coding
AT1G57550	AT1G57550.1	-2.87126	0.000531904	Low temperature and salt responsive protein family; INVOLVED IN: response to cold, hyperosmotic salinity response; LOCATED IN: endomembrane system, integral to membrane; EXPRESSED IN: 7 plant structures; EXPRESSED DURING: L mature pollen stage, 4 anthesis, petal differentiation and expansion stage; CONTAINS InterPro DOMAIN/s: Uncharacterised protein family UPF0057 (InterPro:IPR000612); BEST Arabi…	protein_coding
AT4G03620	AT4G03620.1	-2.86311	1.31543e-14	myosin heavy chain-related	protein_coding
AT3G16040	AT3G16040.1	-2.85771	8.20054e-07	Translation machinery associated TMA7; CONTAINS InterPro DOMAIN/s: Translation machinery associated TMA7 (InterPro:IPR015157); BEST Arabidopsis thaliana protein match is: Translation machinery associated TMA7 (TAIR:AT1G15270.1)	protein_coding
AT4G29460	AT4G29460.1	-2.84152	8.24393e-07	Encodes one of the four Arabidopsis phospholipase PLA2 parologs: AT2G06925 (PLA2-ALPHA), AT2G19690 (PLA2-BETA), AT4G29460 (PLA2-GAMMA) and AT4G29470 (PLA2-DELTA). Involved in pollen development and germination and tube growth.	protein_coding	PHOSPHOLIPASE A2 GAMMA (PLA2-GAMMA)	PHOSPHOLIPASE A2 GAMMA (PLA2-GAMMA)
AT1G35490	AT1G35490.1	-2.83811	0.000109706	bZIP family transcription factor; FUNCTIONS IN: DNA binding, sequence-specific DNA binding transcription factor activity; INVOLVED IN: regulation of transcription, DNA-dependent; EXPRESSED IN: 9 plant structures; EXPRESSED DURING: L mature pollen stage, M germinated pollen stage, 4 anthesis, C globular stage, petal differentiation and expansion stage; CONTAINS InterPro DOMAIN/s: Basic-leucine zip…	protein_coding
AT5G37810	AT5G37810.1	-2.83433	0.0145633	NOD26-like intrinsic protein 4;1 (NIP4;1); FUNCTIONS IN: water channel activity; INVOLVED IN: transport, transmembrane transport; LOCATED IN: integral to membrane, membrane; EXPRESSED IN: male gametophyte, cultured cell, pollen tube; EXPRESSED DURING: M germinated pollen stage; CONTAINS InterPro DOMAIN/s: Major intrinsic protein, conserved site (InterPro:IPR022357), Aquaporin (InterPro:IPR012269)…	protein_coding	NOD26-LIKE INTRINSIC PROTEIN 4;1 (NIP4;1)	NOD26-LIKE MIP 4 (NLM4);NOD26-LIKE INTRINSIC PROTEIN 4;1 (NIP4;1)
AT5G23270	AT5G23270.1	-2.82959	2.30851e-10	sugar transporter 11 (STP11); FUNCTIONS IN: carbohydrate transmembrane transporter activity, sugar:hydrogen symporter activity; INVOLVED IN: transport, transmembrane transport; LOCATED IN: integral to membrane, membrane; EXPRESSED IN: 23 plant structures; EXPRESSED DURING: 13 growth stages; CONTAINS InterPro DOMAIN/s: Sugar transporter, conserved site (InterPro:IPR005829), Major facilitator super…	protein_coding	SUGAR TRANSPORTER 11 (STP11)	SUGAR TRANSPORTER 11 (STP11);SUGAR TRANSPORTER 11 (ATSTP11)
AT4G17690	AT4G17690.1	-2.8212	9.33964e-05	Peroxidase superfamily protein; FUNCTIONS IN: peroxidase activity, heme binding; INVOLVED IN: response to oxidative stress, oxidation reduction; LOCATED IN: endomembrane system; EXPRESSED IN: 21 plant structures; EXPRESSED DURING: 11 growth stages; CONTAINS InterPro DOMAIN/s: Haem peroxidase (InterPro:IPR010255), Plant peroxidase (InterPro:IPR000823), Peroxidases heam-ligand binding site (InterPr…	protein_coding
AT2G20470	AT2G20470.1	-2.81633	0.0226291	AGC (cAMP-dependent, cGMP-dependent and protein kinase C) kinase family protein; FUNCTIONS IN: kinase activity; INVOLVED IN: protein amino acid phosphorylation; EXPRESSED IN: male gametophyte; EXPRESSED DURING: M germinated pollen stage; CONTAINS InterPro DOMAIN/s: Protein kinase, ATP binding site (InterPro:IPR017441), Serine/threonine-protein kinase domain (InterPro:IPR002290), Serine/threonine-…	protein_coding
AT4G21900	AT4G21900.1	-2.80343	3.59096e-05	Encodes a proteinaceous RNase P that supports RNase P activity in vivo in both organelles and the nucleus. It is also involved in the maturation of small nucleolar RNA (snoRNA) and mRNA.	protein_coding	PROTEINACEOUS RNASE P 3 (PRORP3)	PROTEINACEOUS RNASE P 3 (PRORP3)
AT3G28750	AT3G28750.1	-2.80297	4.82915e-06	unknown protein; LOCATED IN: endomembrane system; EXPRESSED IN: 12 plant structures; EXPRESSED DURING: L mature pollen stage, M germinated pollen stage, 4 anthesis, C globular stage, petal differentiation and expansion stage; CONTAINS InterPro DOMAIN/s: Protein of unknown function DUF1216 (InterPro:IPR009605); BEST Arabidopsis thaliana protein match is: unknown protein (TAIR:AT5G39880.1)	protein_coding
AT4G02250	AT4G02250.1	-2.78507	0.0122772	Plant invertase/pectin methylesterase inhibitor superfamily protein; FUNCTIONS IN: enzyme inhibitor activity, pectinesterase inhibitor activity, pectinesterase activity; INVOLVED IN: biological_process unknown; LOCATED IN: endomembrane system; EXPRESSED IN: 9 plant structures; EXPRESSED DURING: L mature pollen stage, M germinated pollen stage, 4 anthesis, C globular stage, petal differentiation a…	protein_coding
AT1G79400	AT1G79400.1	-2.78264	1.24512e-06	member of Putative Na+/H+ antiporter family	protein_coding	CATION/H+ EXCHANGER 2 (CHX2)	CATION/H+ EXCHANGER 2 (ATCHX2);CATION/H+ EXCHANGER 2 (CHX2)
AT1G21200	AT1G21200.1	-2.78223	0.0483491	sequence-specific DNA binding transcription factors; CONTAINS InterPro DOMAIN/s: SANT, DNA-binding (InterPro:IPR001005); BEST Arabidopsis thaliana protein match is: unknown protein (TAIR:AT1G76870.1)	protein_coding
AT2G20070	AT2G20070.1	-2.77795	0.0122772	FUNCTIONS IN: molecular_function unknown; LOCATED IN: endomembrane system; BEST Arabidopsis thaliana protein match is: low-molecular-weight cysteine-rich 81 (TAIR:AT2G25295.1)	protein_coding
AT1G74000	AT1G74000.1	-2.77363	0.0033939	encodes a protein similar to strictosidine synthase, which is involved in the production of monoterpene indole alkaloids. This gene belongs to a family of 13 members in Arabidopsis.	protein_coding	STRICTOSIDINE SYNTHASE 3 (SS3)	STRICTOSIDINE SYNTHASE 3 (SS3)
AT5G07430	AT5G07430.1	-2.77175	8.3124e-05	Pectin lyase-like superfamily protein; FUNCTIONS IN: pectinesterase activity; INVOLVED IN: cell wall modification; LOCATED IN: endomembrane system, cell wall, plant-type cell wall; EXPRESSED IN: 9 plant structures; EXPRESSED DURING: L mature pollen stage, M germinated pollen stage, 4 anthesis, C globular stage, petal differentiation and expansion stage; CONTAINS InterPro DOMAIN/s: Pectin lyase fo…	protein_coding
AT3G28820	AT3G28820.1	-2.75048	1.44232e-06	Protein of unknown function (DUF1216); FUNCTIONS IN: molecular_function unknown; INVOLVED IN: biological_process unknown; LOCATED IN: endomembrane system; CONTAINS InterPro DOMAIN/s: Protein of unknown function DUF1216 (InterPro:IPR009605); BEST Arabidopsis thaliana protein match is: Protein of unknown function (DUF1216) (TAIR:AT3G28810.1)	protein_coding
AT1G67290	AT1G67290.1	-2.74641	0.00236498	glyoxal oxidase-related protein; FUNCTIONS IN: molecular_function unknown; INVOLVED IN: biological_process unknown; LOCATED IN: endomembrane system; EXPRESSED IN: 10 plant structures; EXPRESSED DURING: L mature pollen stage, M germinated pollen stage, 4 anthesis, C globular stage, petal differentiation and expansion stage; CONTAINS InterPro DOMAIN/s: Galactose oxidase/kelch, beta-propeller (Inter…	protein_coding	GLYOXAL OXIDASE 1 (GLOX1)	GLYOXAL OXIDASE 1 (GLOX1)
AT2G47040	AT2G47040.1	-2.74354	7.61733e-11	Share high homologies with a group of pectin methylesterases (PME), pollen specific, and is required for enhancing the growth of pollen tube in style and transmitting tract tissues.	protein_coding	VANGUARD1 (VGD1)	VANGUARD1 (VGD1)
AT1G60760	AT1G60760.1	-2.74124	0.0134446	Plant invertase/pectin methylesterase inhibitor superfamily protein; FUNCTIONS IN: enzyme inhibitor activity, pectinesterase inhibitor activity, pectinesterase activity; INVOLVED IN: biological_process unknown; LOCATED IN: endomembrane system; CONTAINS InterPro DOMAIN/s: Pectinesterase inhibitor (InterPro:IPR006501); BEST Arabidopsis thaliana protein match is: Plant invertase/pectin methylesteras…	protein_coding
AT5G09910	AT5G09910.1	-2.74084	0.0275456	Ras-related small GTP-binding family protein; FUNCTIONS IN: GTP binding, transcription factor binding, ATP binding; INVOLVED IN: protein transport, small GTPase mediated signal transduction, regulation of transcription, DNA-dependent; LOCATED IN: intracellular; CONTAINS InterPro DOMAIN/s: Ras GTPase (InterPro:IPR001806), Small GTPase (InterPro:IPR020851), Ras (InterPro:IPR013753), Ras small GTPas…	protein_coding
AT1G71680	AT1G71680.1	-2.73246	0.0318864	Transmembrane amino acid transporter family protein; CONTAINS InterPro DOMAIN/s: Amino acid transporter, transmembrane (InterPro:IPR013057); BEST Arabidopsis thaliana protein match is: lysine histidine transporter 1 (TAIR:AT5G40780.2)	protein_coding
AT5G64790	AT5G64790.1	-2.71683	0.0159835	O-Glycosyl hydrolases family 17 protein; FUNCTIONS IN: cation binding, hydrolase activity, hydrolyzing O-glycosyl compounds, catalytic activity; INVOLVED IN: carbohydrate metabolic process; LOCATED IN: anchored to membrane; EXPRESSED IN: 7 plant structures; EXPRESSED DURING: L mature pollen stage, M germinated pollen stage, 4 anthesis, petal differentiation and expansion stage; CONTAINS InterPro …	protein_coding
AT5G65690	AT5G65690.1	-2.71267	0.000121609	Encodes a putative phosphoenolpyruvate carboxykinase (ATP-dependent). The mRNA is cell-to-cell mobile.	protein_coding	PHOSPHOENOLPYRUVATE CARBOXYKINASE 2 (PCK2)	PHOSPHOENOLPYRUVATE CARBOXYKINASE 2 (PCK2);PHOSPHOENOLPYRUVATE CARBOXYKINASE (PEPCK)
AT2G46860	AT2G46860.1	-2.70972	6.05199e-09	Encodes a protein that might have inorganic pyrophosphatase activity.	protein_coding	PYROPHOSPHORYLASE 3 (PPa3)	PYROPHOSPHORYLASE 3 (AtPPa3);PYROPHOSPHORYLASE 3 (PPa3)
AT3G60570	AT3G60570.1	-2.70627	0.000150605	member of BETA-EXPANSINS. Naming convention from the Expansin Working Group (Kende et al, 2004. Plant Mol Bio)	protein_coding	EXPANSIN B5 (EXPB5)	EXPANSIN B5 (ATEXPB5);EXPANSIN B5 (EXPB5); (ATHEXP BETA 1.3)
AT4G13560	AT4G13560.1	-2.70617	7.21013e-12	unfertilized embryo sac 15 (UNE15); FUNCTIONS IN: molecular_function unknown; INVOLVED IN: double fertilization forming a zygote and endosperm, embryo development ending in seed dormancy; LOCATED IN: cellular_component unknown; EXPRESSED IN: 15 plant structures; EXPRESSED DURING: 11 growth stages; BEST Arabidopsis thaliana protein match is: Late embryogenesis abundant protein (LEA) family protein…	protein_coding	UNFERTILIZED EMBRYO SAC 15 (UNE15)	UNFERTILIZED EMBRYO SAC 15 (UNE15);NAD-DEPENDENT MALIC ENZYME 1 (NAD-ME1)
AT3G28840	AT3G28840.1	-2.69423	2.18439e-15	Protein of unknown function (DUF1216); LOCATED IN: endomembrane system; EXPRESSED IN: 9 plant structures; EXPRESSED DURING: L mature pollen stage, M germinated pollen stage, 4 anthesis, petal differentiation and expansion stage; CONTAINS InterPro DOMAIN/s: Protein of unknown function DUF1216 (InterPro:IPR009605); BEST Arabidopsis thaliana protein match is: Protein of unknown function (DUF1216) (T…	protein_coding
AT5G17480	AT5G17480.1	-2.68997	1.34792e-05	pollen calcium-binding protein 1 (PC1); FUNCTIONS IN: calcium ion binding; INVOLVED IN: biological_process unknown; LOCATED IN: cytoplasm; EXPRESSED IN: 8 plant structures; EXPRESSED DURING: L mature pollen stage, M germinated pollen stage, 4 anthesis, petal differentiation and expansion stage; CONTAINS InterPro DOMAIN/s: EF-Hand 1, calcium-binding site (InterPro:IPR018247), EF-HAND 2 (InterPro:I…	protein_coding	POLLEN CALCIUM-BINDING PROTEIN 1 (PC1)	POLLEN CALCIUM-BINDING PROTEIN 1 (APC1);POLLEN CALCIUM-BINDING PROTEIN 1 (PC1)
AT5G62850	AT5G62850.1	-2.68512	1.19918e-09	Encodes a protein that is expressed in vegetative cells of pollen. A member of the SWEET sucrose efflux transporter family proteins.	protein_coding	VEGETATIVE CELL EXPRESSED1 (AtVEX1)	VEGETATIVE CELL EXPRESSED1 (AtVEX1); (SWEET5); (AtSWEET5)
AT2G19010	AT2G19010.1	-2.68243	0.034844	GDSL-motif esterase/acyltransferase/lipase. Enzyme group with broad substrate specificity that may catalyze acyltransfer or hydrolase reactions with lipid and non-lipid substrates.	protein_coding
AT4G12860	AT4G12860.1	-2.68187	6.03848e-07	unfertilized embryo sac 14 (UNE14); FUNCTIONS IN: calcium ion binding; INVOLVED IN: double fertilization forming a zygote and endosperm; LOCATED IN: cytoplasm; EXPRESSED IN: leaf whorl, male gametophyte, flower, pollen tube; EXPRESSED DURING: L mature pollen stage, M germinated pollen stage, 4 anthesis; CONTAINS InterPro DOMAIN/s: Parvalbumin (InterPro:IPR008080), EF-Hand 1, calcium-binding site …	protein_coding	UNFERTILIZED EMBRYO SAC 14 (UNE14)	UNFERTILIZED EMBRYO SAC 14 (UNE14)
AT5G47470	AT5G47470.1	-2.67285	2.99025e-16	nodulin MtN21-like transporter family protein	protein_coding	USUALLY MULTIPLE ACIDS MOVE IN AND OUT TRANSPORTERS 7 (UMAMIT7)	USUALLY MULTIPLE ACIDS MOVE IN AND OUT TRANSPORTERS 7 (UMAMIT7)
AT2G15340	AT2G15340.1	-2.66258	0.0438683	glycine-rich protein; FUNCTIONS IN: molecular_function unknown; INVOLVED IN: biological_process unknown; LOCATED IN: endomembrane system; EXPRESSED IN: petal, leaf whorl, male gametophyte, flower, pollen tube; EXPRESSED DURING: L mature pollen stage, M germinated pollen stage, 4 anthesis, petal differentiation and expansion stage; BEST Arabidopsis thaliana protein match is: Cupredoxin superfamily…	protein_coding
AT5G44300	AT5G44300.1	-2.65942	0.00122532	Dormancy/auxin associated family protein; CONTAINS InterPro DOMAIN/s: Dormancyauxin associated (InterPro:IPR008406); BEST Arabidopsis thaliana protein match is: Dormancy/auxin associated family protein (TAIR:AT2G33830.2)	protein_coding
AT5G39870	AT5G39870.1	-2.65036	0.02153	Protein of unknown function (DUF1216); LOCATED IN: endomembrane system; EXPRESSED IN: petal, male gametophyte, flower, cultured cell; EXPRESSED DURING: L mature pollen stage, M germinated pollen stage, 4 anthesis, petal differentiation and expansion stage; CONTAINS InterPro DOMAIN/s: Protein of unknown function DUF1216 (InterPro:IPR009605); BEST Arabidopsis thaliana protein match is: Protein of u…	protein_coding
AT2G22180	AT2G22180.1	-2.64586	0.00861527	hydroxyproline-rich glycoprotein family protein; BEST Arabidopsis thaliana protein match is: hydroxyproline-rich glycoprotein family protein (TAIR:AT4G39745.1)	protein_coding
AT3G19090	AT3G19090.1	-2.64496	0.00531159	RNA-binding protein; FUNCTIONS IN: RNA binding, nucleotide binding, nucleic acid binding; INVOLVED IN: RNA processing; LOCATED IN: ribonucleoprotein complex, nucleus; EXPRESSED IN: 22 plant structures; EXPRESSED DURING: 12 growth stages; CONTAINS InterPro DOMAIN/s: Winged helix-turn-helix transcription repressor DNA-binding (InterPro:IPR011991), RNA-binding protein Lupus La (InterPro:IPR006630), …	protein_coding	LA RELATED PROTEIN 6C (LARP6C)	LA RELATED PROTEIN 6C (LARP6C); (ATLARP6C)
AT2G40850	AT2G40850.1	-2.63048	0.00605398	phosphoinositide 4-kinase gamma 1 (PI4K GAMMA 1); FUNCTIONS IN: inositol or phosphatidylinositol kinase activity, phosphotransferase activity, alcohol group as acceptor; INVOLVED IN: biological_process unknown; LOCATED IN: cellular_component unknown; EXPRESSED IN: tapetum, microspore; CONTAINS InterPro DOMAIN/s: Phosphatidylinositol 3-/4-kinase, catalytic (InterPro:IPR000403); BEST Arabidopsis th…	protein_coding	PHOSPHOINOSITIDE 4-KINASE GAMMA 1 (PI4K GAMMA 1)	PHOSPHOINOSITIDE 4-KINASE GAMMA 1 (ATPI4K GAMMA 1);PHOSPHOINOSITIDE 4-KINASE GAMMA 1 (PI4K GAMMA 1)
AT1G62450	AT1G62450.1	-2.62534	0.0115554	Immunoglobulin E-set superfamily protein; FUNCTIONS IN: Rho GDP-dissociation inhibitor activity; INVOLVED IN: biological_process unknown; LOCATED IN: cytoplasm; EXPRESSED IN: 10 plant structures; EXPRESSED DURING: 6 growth stages; CONTAINS InterPro DOMAIN/s: Immunoglobulin E-set (InterPro:IPR014756), RHO protein GDP dissociation inhibitor (InterPro:IPR000406); BEST Arabidopsis thaliana protein ma…	protein_coding
AT5G07420	AT5G07420.1	-2.62284	0.000339939	Pectin lyase-like superfamily protein; FUNCTIONS IN: pectinesterase activity; INVOLVED IN: cell wall modification; LOCATED IN: endomembrane system, cell wall, plant-type cell wall; EXPRESSED IN: 10 plant structures; EXPRESSED DURING: L mature pollen stage, M germinated pollen stage, 4 anthesis, C globular stage, petal differentiation and expansion stage; CONTAINS InterPro DOMAIN/s: Pectin lyase f…	protein_coding
AT3G18810	AT3G18810.1	-2.62068	0.000206208	Encodes a member of the proline-rich extensin-like receptor kinase (PERK) family. This family consists of 15 predicted receptor kinases (PMID: 15653807).	protein_coding	PROLINE-RICH EXTENSIN-LIKE RECEPTOR KINASE 6 (PERK6)	PROLINE-RICH EXTENSIN-LIKE RECEPTOR KINASE 6 (PERK6);PROLINE-RICH EXTENSIN-LIKE RECEPTOR KINASE 6 (AtPERK6)
AT1G64320	AT1G64320.1	-2.60437	2.15634e-08	myosin heavy chain-related; FUNCTIONS IN: molecular_function unknown; INVOLVED IN: response to cadmium ion; LOCATED IN: cellular_component unknown; EXPRESSED IN: male gametophyte, flower, cultured cell, pollen tube; EXPRESSED DURING: L mature pollen stage, M germinated pollen stage, 4 anthesis; BEST Arabidopsis thaliana protein match is: myosin heavy chain-related (TAIR:AT5G41780.1)	protein_coding
AT2G10970	AT2G10970.1	-2.59603	0.000354203	Plant invertase/pectin methylesterase inhibitor superfamily protein; FUNCTIONS IN: enzyme inhibitor activity, pectinesterase inhibitor activity, pectinesterase activity; INVOLVED IN: biological_process unknown; LOCATED IN: endomembrane system; EXPRESSED IN: 6 plant structures; EXPRESSED DURING: L mature pollen stage, M germinated pollen stage, 4 anthesis, petal differentiation and expansion stage…	protein_coding
AT5G46990	AT5G46990.1	-2.587	0.0043195	Plant invertase/pectin methylesterase inhibitor superfamily protein; FUNCTIONS IN: enzyme inhibitor activity, pectinesterase inhibitor activity, pectinesterase activity; INVOLVED IN: biological_process unknown; LOCATED IN: endomembrane system; CONTAINS InterPro DOMAIN/s: Pectinesterase inhibitor (InterPro:IPR006501); BEST Arabidopsis thaliana protein match is: Plant invertase/pectin methylesteras…	protein_coding
AT4G29880	AT4G29880.1	-2.57184	0.00113972	Encodes PIRL7, a member of the Plant Intracellular Ras-group-related LRRs (Leucine rich repeat proteins). PIRLs are a distinct, plant-specific class of intracellular LRRs that likely mediate protein interactions, possibly in the context of signal transduction.	protein_coding	PLANT INTRACELLULAR RAS GROUP-RELATED LRR 7 (PIRL7)	PLANT INTRACELLULAR RAS GROUP-RELATED LRR 7 (PIRL7)
AT1G29140	AT1G29140.1	-2.55686	3.59116e-07	Pollen Ole e 1 allergen and extensin family protein; FUNCTIONS IN: molecular_function unknown; INVOLVED IN: biological_process unknown; LOCATED IN: endomembrane system; EXPRESSED IN: 9 plant structures; EXPRESSED DURING: L mature pollen stage, M germinated pollen stage, 4 anthesis, C globular stage, petal differentiation and expansion stage; CONTAINS InterPro DOMAIN/s: Pollen Ole e 1 allergen/ext…	protein_coding
AT3G05820	AT3G05820.1	-2.55343	9.41913e-05	Encodes a putative plastid-targeted alkaline/neutral invertase.	protein_coding	INVERTASE H (INVH)	ALKALINE/NEUTRAL INVERTASE H (A/N-InvH);INVERTASE H (INVH);ARABIDOPSIS ALKALINE/NEUTRAL INVERTASE H (At-A/N-InvH)
AT3G53070	AT3G53070.1	-2.55182	0.0033939	Putative membrane lipoprotein; FUNCTIONS IN: sugar binding; INVOLVED IN: N-terminal protein myristoylation; LOCATED IN: endomembrane system; EXPRESSED IN: petal, leaf whorl, flower; EXPRESSED DURING: 4 anthesis, petal differentiation and expansion stage; CONTAINS InterPro DOMAIN/s: D-galactoside/L-rhamnose binding SUEL lectin (InterPro:IPR000922); BEST Arabidopsis thaliana protein match is: D-gal…	protein_coding
AT4G39110	AT4G39110.1	-2.55037	0.0345281	Malectin/receptor-like protein kinase family protein; FUNCTIONS IN: kinase activity; INVOLVED IN: protein amino acid phosphorylation; LOCATED IN: chloroplast; EXPRESSED IN: 10 plant structures; EXPRESSED DURING: L mature pollen stage, M germinated pollen stage, 4 anthesis, C globular stage, petal differentiation and expansion stage; CONTAINS InterPro DOMAIN/s: Protein kinase, ATP binding site (In…	protein_coding
AT5G09550	AT5G09550.1	-2.5457	1.1303e-05	GDP dissociation inhibitor family protein / Rab GTPase activator family protein; FUNCTIONS IN: RAB GDP-dissociation inhibitor activity; INVOLVED IN: regulation of GTPase activity, protein transport; LOCATED IN: cellular_component unknown; EXPRESSED IN: 16 plant structures; EXPRESSED DURING: 12 growth stages; CONTAINS InterPro DOMAIN/s: Rab GTPase activator (InterPro:IPR002005), GDP dissociation i…	protein_coding	RAB GDP-DISSOCIATION INHIBITOR (GDI)	RAB GDP-DISSOCIATION INHIBITOR (GDI)
AT3G62100	AT3G62100.1	-2.54501	2.34572e-08	Encodes a member of the Aux/IAA family of proteins implicated in auxin signaling. IAA30 lacks the conserved degron (domain II) found in many family members. IAA30 transcripts are induced by auxin treatment and accumulate preferentially in the quiescent center cells of the root meristem. Overexpression of IAA30 leads to defects in gravitropism, root development, root meristem maintenance, and coty…	protein_coding	INDOLE-3-ACETIC ACID INDUCIBLE 30 (IAA30)	INDOLE-3-ACETIC ACID INDUCIBLE 30 (IAA30)
AT5G46930	AT5G46930.1	-2.51439	0.000183909	Plant invertase/pectin methylesterase inhibitor superfamily protein; FUNCTIONS IN: enzyme inhibitor activity, pectinesterase inhibitor activity, pectinesterase activity; INVOLVED IN: biological_process unknown; LOCATED IN: endomembrane system; CONTAINS InterPro DOMAIN/s: Pectinesterase inhibitor (InterPro:IPR006501); BEST Arabidopsis thaliana protein match is: Plant invertase/pectin methylesteras…	protein_coding
AT1G32250	AT1G32250.1	-2.5053	0.000456158	Calcium-binding EF-hand family protein; FUNCTIONS IN: calcium ion binding; INVOLVED IN: biological_process unknown; LOCATED IN: cellular_component unknown; EXPRESSED IN: petal, leaf whorl, flower; EXPRESSED DURING: 4 anthesis, petal differentiation and expansion stage; CONTAINS InterPro DOMAIN/s: EF-Hand 1, calcium-binding site (InterPro:IPR018247), EF-HAND 2 (InterPro:IPR018249), EF-hand-like do…	protein_coding
AT1G63060	AT1G63060.1	-2.50454	0.000887202	unknown protein; FUNCTIONS IN: molecular_function unknown; INVOLVED IN: biological_process unknown; LOCATED IN: mitochondrion; EXPRESSED IN: petal, leaf whorl, male gametophyte, flower; EXPRESSED DURING: L mature pollen stage, M germinated pollen stage, 4 anthesis, petal differentiation and expansion stage; BEST Arabidopsis thaliana protein match is: unknown protein (TAIR:AT5G07330.1)	protein_coding
AT1G04450	AT1G04450.1	-2.49275	0.0043195	Encodes a member of a novel protein family that contains contain a CRIB (for Cdc42/Rac-interactive binding) motif required for their specific interaction with GTP-bound Rop1 (plant-specific Rho GTPase). It interacts with Rop1 and is involved in pollen tube growth and function, and exocytosis in the pollen tube tip. The protein most similar to RIC1 (family subgroup III). Gene is expressed predomin…	protein_coding	ROP-INTERACTIVE CRIB MOTIF-CONTAINING PROTEIN 3 (RIC3)	ROP-INTERACTIVE CRIB MOTIF-CONTAINING PROTEIN 3 (RIC3)
AT2G03410	AT2G03410.1	-2.4825	2.36765e-06	Mo25 family protein; FUNCTIONS IN: binding; INVOLVED IN: biological_process unknown; LOCATED IN: cellular_component unknown; EXPRESSED IN: sepal, male gametophyte, flower, stamen, pollen tube; EXPRESSED DURING: L mature pollen stage, M germinated pollen stage, 4 anthesis; CONTAINS InterPro DOMAIN/s: Mo25-like (InterPro:IPR013878), Armadillo-type fold (InterPro:IPR016024); BEST Arabidopsis thalian…	protein_coding
AT2G47050	AT2G47050.1	-2.47939	0.000277273	Plant invertase/pectin methylesterase inhibitor superfamily protein; FUNCTIONS IN: enzyme inhibitor activity, pectinesterase inhibitor activity, pectinesterase activity; INVOLVED IN: biological_process unknown; LOCATED IN: endomembrane system; EXPRESSED IN: 12 plant structures; EXPRESSED DURING: L mature pollen stage, M germinated pollen stage, 4 anthesis, C globular stage, petal differentiation …	protein_coding
AT2G26490	AT2G26490.1	-2.47546	0.033939	JGB contains seven WD40 repeats and is highly conserved in flowering plants. Overexpression inhibits pollen germination. suggesting JGB is a negative regulator of pollen germination	protein_coding	JINGUBANG (JGB)	JINGUBANG (JGB)
AT1G66360	AT1G66360.1	-2.47427	7.99188e-06	Calcium-dependent lipid-binding (CaLB domain) family protein; CONTAINS InterPro DOMAIN/s: C2 membrane targeting protein (InterPro:IPR018029), C2 calcium/lipid-binding domain, CaLB (InterPro:IPR008973), C2 calcium-dependent membrane targeting (InterPro:IPR000008); BEST Arabidopsis thaliana protein match is: Calcium-dependent lipid-binding (CaLB domain) family protein (TAIR:AT5G37740.1)	protein_coding	C2-DOMAIN ABA-RELATED2 (CAR2)	C2-DOMAIN ABA-RELATED2 (CAR2)
AT1G18530	AT1G18530.1	-2.45963	0.00236498	EF hand calcium-binding protein family; FUNCTIONS IN: calcium ion binding; INVOLVED IN: biological_process unknown; LOCATED IN: cellular_component unknown; EXPRESSED IN: male gametophyte, flower, pollen tube; EXPRESSED DURING: L mature pollen stage, M germinated pollen stage, 4 anthesis; CONTAINS InterPro DOMAIN/s: EF-Hand 1, calcium-binding site (InterPro:IPR018247), EF-HAND 2 (InterPro:IPR01824…	protein_coding
AT5G46970	AT5G46970.1	-2.45622	0.026912	Plant invertase/pectin methylesterase inhibitor superfamily protein; FUNCTIONS IN: enzyme inhibitor activity, pectinesterase inhibitor activity, pectinesterase activity; INVOLVED IN: biological_process unknown; LOCATED IN: endomembrane system; CONTAINS InterPro DOMAIN/s: Pectinesterase inhibitor (InterPro:IPR006501); BEST Arabidopsis thaliana protein match is: Plant invertase/pectin methylesteras…	protein_coding
AT5G26060	AT5G26060.1	-2.44918	4.59314e-06	Plant self-incompatibility protein S1 family; FUNCTIONS IN: molecular_function unknown; INVOLVED IN: biological_process unknown; LOCATED IN: endomembrane system; EXPRESSED IN: 9 plant structures; EXPRESSED DURING: L mature pollen stage, M germinated pollen stage, 4 anthesis, C globular stage, petal differentiation and expansion stage; CONTAINS InterPro DOMAIN/s: Plant self-incompatibility S1 (Int…	protein_coding
AT2G26410	AT2G26410.1	-2.449	0.0489994	IQ-domain 4 (Iqd4); CONTAINS InterPro DOMAIN/s: IQ calmodulin-binding region (InterPro:IPR000048); BEST Arabidopsis thaliana protein match is: IQ-domain 2 (TAIR:AT5G03040.3)	protein_coding	IQ-DOMAIN 4 (Iqd4)	IQ-DOMAIN 4 (Iqd4)
AT1G07330	AT1G07330.1	-2.44419	0.0093	unknown protein; BEST Arabidopsis thaliana protein match is: unknown protein (TAIR:AT2G29620.1)	protein_coding
AT2G36020	AT2G36020.1	-2.4433	0.00113972	HVA22-like protein J (HVA22J); FUNCTIONS IN: molecular_function unknown; INVOLVED IN: biological_process unknown; LOCATED IN: endomembrane system; EXPRESSED IN: 10 plant structures; EXPRESSED DURING: L mature pollen stage, M germinated pollen stage, 4 anthesis, C globular stage, petal differentiation and expansion stage; CONTAINS InterPro DOMAIN/s: TB2/DP1/HVA22 related protein (InterPro:IPR00434…	protein_coding	HVA22-LIKE PROTEIN J (HVA22J)	HVA22-LIKE PROTEIN J (HVA22J)
AT3G01250	AT3G01250.1	-2.4415	0.00236498	unknown protein; FUNCTIONS IN: molecular_function unknown; INVOLVED IN: biological_process unknown; LOCATED IN: endomembrane system; EXPRESSED IN: 9 plant structures; EXPRESSED DURING: L mature pollen stage, M germinated pollen stage, 4 anthesis, C globular stage, petal differentiation and expansion stage	protein_coding
AT3G29070	AT3G29070.1	-2.43533	0.0178356	emp24/gp25L/p24 family/GOLD family protein; FUNCTIONS IN: protein transmembrane transporter activity; INVOLVED IN: intracellular protein transport, transport; LOCATED IN: mitochondrion, integral to membrane, membrane; EXPRESSED IN: 7 plant structures; EXPRESSED DURING: L mature pollen stage, M germinated pollen stage, 4 anthesis, petal differentiation and expansion stage; CONTAINS InterPro DOMAIN…	protein_coding
AT3G17630	AT3G17630.1	-2.43438	8.08508e-09	member of Putative Na+/H+ antiporter family	protein_coding	CATION/H+ EXCHANGER 19 (CHX19)	CATION/H+ EXCHANGER 19 (ATCHX19);CATION/H+ EXCHANGER 19 (CHX19)
AT3G52010	AT3G52010.1	-2.43289	0.0365729	serine carboxypeptidase-like 37 (scpl37); FUNCTIONS IN: serine-type carboxypeptidase activity; INVOLVED IN: proteolysis; LOCATED IN: endomembrane system; CONTAINS InterPro DOMAIN/s: Peptidase S10, serine carboxypeptidase (InterPro:IPR001563), Peptidase S10, serine carboxypeptidase, active site (InterPro:IPR018202); BEST Arabidopsis thaliana protein match is: serine carboxypeptidase-like 36 (TAIR:…	protein_coding	SERINE CARBOXYPEPTIDASE-LIKE 37 (scpl37)	SERINE CARBOXYPEPTIDASE-LIKE 37 (scpl37)
AT3G53080	AT3G53080.1	-2.43162	0.0145633	D-galactoside/L-rhamnose binding SUEL lectin protein; FUNCTIONS IN: sugar binding, hydrolase activity, hydrolyzing O-glycosyl compounds; INVOLVED IN: lactose catabolic process, using glucoside 3-dehydrogenase, carbohydrate metabolic process, lactose catabolic process via UDP-galactose, lactose catabolic process; LOCATED IN: endomembrane system; EXPRESSED IN: petal, leaf whorl, flower; EXPRESSED D…	protein_coding
AT5G51030	AT5G51030.1	-2.42131	0.000727164	NAD(P)-binding Rossmann-fold superfamily protein; FUNCTIONS IN: oxidoreductase activity, binding, catalytic activity; INVOLVED IN: oxidation reduction, metabolic process; LOCATED IN: cellular_component unknown; EXPRESSED IN: 9 plant structures; EXPRESSED DURING: L mature pollen stage, M germinated pollen stage, 4 anthesis, petal differentiation and expansion stage; CONTAINS InterPro DOMAIN/s: NAD…	protein_coding
AT2G13350	AT2G13350.1	-2.4194	1.40863e-06	Calcium-dependent lipid-binding (CaLB domain) family protein; FUNCTIONS IN: molecular_function unknown; INVOLVED IN: biological_process unknown; LOCATED IN: endomembrane system; EXPRESSED IN: 9 plant structures; EXPRESSED DURING: L mature pollen stage, M germinated pollen stage, 4 anthesis, C globular stage, petal differentiation and expansion stage; CONTAINS InterPro DOMAIN/s: C2 calcium/lipid-b…	protein_coding
AT1G23840	AT1G23840.1	-2.40929	0.0115554	unknown protein; LOCATED IN: endomembrane system; EXPRESSED IN: 18 plant structures; EXPRESSED DURING: 12 growth stages; BEST Arabidopsis thaliana protein match is: unknown protein (TAIR:AT1G23850.1)	protein_coding
AT1G15415	AT1G15415.1	-2.40852	7.97915e-05	The protein encoded by this gene was identified as a part of pollen proteome by mass spec analysis. It has weak homology to LEA (late embryo abundant) proteins. Encodes protein phosphatase 2A (PP2A) B'gamma subunit. Targeted to nucleus and cytosol.	protein_coding
AT3G05150	AT3G05150.1	-2.40718	0.0330101	Major facilitator superfamily protein; FUNCTIONS IN: carbohydrate transmembrane transporter activity, sugar:hydrogen symporter activity; INVOLVED IN: transport, transmembrane transport; LOCATED IN: nucleus, membrane; EXPRESSED IN: 12 plant structures; EXPRESSED DURING: L mature pollen stage, M germinated pollen stage, 4 anthesis, petal differentiation and expansion stage; CONTAINS InterPro DOMAIN…	protein_coding
AT3G07830	AT3G07830.1	-2.40351	0.000130521	Pectin lyase-like superfamily protein; FUNCTIONS IN: polygalacturonase activity; INVOLVED IN: carbohydrate metabolic process; LOCATED IN: plant-type cell wall; EXPRESSED IN: 7 plant structures; EXPRESSED DURING: L mature pollen stage, M germinated pollen stage, 4 anthesis, petal differentiation and expansion stage; CONTAINS InterPro DOMAIN/s: Pectin lyase fold/virulence factor (InterPro:IPR011050…	protein_coding	POLYGALACTURONASE 3 (PGA3)	POLYGALACTURONASE 3 (PGA3)
AT2G33870	AT2G33870.1	-2.39291	0.000260196	RAB GTPase homolog A1H (ArRABA1h); FUNCTIONS IN: GTP binding; INVOLVED IN: protein transport, small GTPase mediated signal transduction; EXPRESSED IN: male gametophyte, flower, pollen tube; EXPRESSED DURING: L mature pollen stage, M germinated pollen stage, 4 anthesis; CONTAINS InterPro DOMAIN/s: Ras GTPase (InterPro:IPR001806), Small GTP-binding protein (InterPro:IPR005225), Small GTPase (InterP…	protein_coding	RAB GTPASE HOMOLOG A1H (ArRABA1h)	RAB GTPASE HOMOLOG A1H (ArRABA1h)
AT5G53820	AT5G53820.1	-2.39248	8.14466e-09	Late embryogenesis abundant protein (LEA) family protein; BEST Arabidopsis thaliana protein match is: Late embryogenesis abundant protein (LEA) family protein (TAIR:AT5G38760.1)	protein_coding
AT3G01700	AT3G01700.1	-2.39204	0.00236498	Encodes an arabinogalactan protein that is expressed in pollen, pollen sac and pollen tube. Loss of AGP11 function results in decreased fertility due to defects in pollen tube growth.	protein_coding	ARABINOGALACTAN PROTEIN 11 (AGP11)	ARABINOGALACTAN PROTEIN 11 (AGP11);ARABINOGALACTAN PROTEIN 11 (AtAGP11)
AT3G42880	AT3G42880.1	-2.37419	0.00101446	Leucine-rich repeat protein kinase family protein; FUNCTIONS IN: protein serine/threonine kinase activity, kinase activity, ATP binding; INVOLVED IN: transmembrane receptor protein tyrosine kinase signaling pathway, protein amino acid phosphorylation; LOCATED IN: endomembrane system; EXPRESSED IN: male gametophyte, flower, pollen tube; EXPRESSED DURING: L mature pollen stage, M germinated pollen …	protein_coding	POLLEN RECEPTOR LIKE KINASE 3 (PRK3)	POLLEN RECEPTOR LIKE KINASE 3 (PRK3)
AT4G36490	AT4G36490.1	-2.36935	0.0184468	SEC14-like 12 (SFH12); CONTAINS InterPro DOMAIN/s: Cellular retinaldehyde-binding/triple function, C-terminal (InterPro:IPR001251), Cellular retinaldehyde-binding/triple function, N-terminal (InterPro:IPR008273), Phosphatidylinositol transfer protein-like, N-terminal (InterPro:IPR011074); BEST Arabidopsis thaliana protein match is: Sec14p-like phosphatidylinositol transfer family protein (TAIR:AT…	protein_coding	SEC14-LIKE 12 (SFH12)	SEC14-LIKE 12 (ATSFH12);SEC14-LIKE 12 (SFH12)
AT5G17590	AT5G17590.1	-2.36695	0.00690306	Putative membrane lipoprotein; FUNCTIONS IN: molecular_function unknown; INVOLVED IN: biological_process unknown; LOCATED IN: endomembrane system	protein_coding
AT2G26850	AT2G26850.1	-2.36507	0.000327778	F-box family protein; FUNCTIONS IN: molecular_function unknown; INVOLVED IN: biological_process unknown; LOCATED IN: endomembrane system; EXPRESSED IN: 15 plant structures; EXPRESSED DURING: 6 growth stages; CONTAINS InterPro DOMAIN/s: F-box domain, cyclin-like (InterPro:IPR001810), F-box domain, Skp2-like (InterPro:IPR022364); BEST Arabidopsis thaliana protein match is: F-box family protein (TAI…	protein_coding
AT3G57690	AT3G57690.1	-2.35823	0.0115554	Encodes a putative arabinogalactan-protein (AGP23).	protein_coding	ARABINOGALACTAN PROTEIN 23 (AGP23)	ARABINOGALACTAN PROTEIN 23 (AGP23);ARABINOGALACTAN-PROTEIN 23 (ATAGP23)
AT5G45880	AT5G45880.1	-2.3496	0.0324077	Pollen Ole e 1 allergen and extensin family protein; FUNCTIONS IN: molecular_function unknown; INVOLVED IN: biological_process unknown; LOCATED IN: extracellular space, endomembrane system; EXPRESSED IN: 11 plant structures; EXPRESSED DURING: L mature pollen stage, M germinated pollen stage, 4 anthesis, C globular stage, petal differentiation and expansion stage; CONTAINS InterPro DOMAIN/s: Polle…	protein_coding
AT3G24620	AT3G24620.1	-2.34519	0.0033939	Encodes a member of KPP-like gene family, homolog of KPP (kinase partner protein) gene in tomato. Also a member of the RopGEF (guanine nucleotide exchange factor) family, containing the novel PRONE domain (plant-specific Rop nucleotide exchanger), which is exclusively active towards members of the Rop subfamily.	protein_coding	ROP (RHO OF PLANTS) GUANINE NUCLEOTIDE EXCHANGE FACTOR 8 (ROPGEF8)	(ATROPGEF8);ROP (RHO OF PLANTS) GUANINE NUCLEOTIDE EXCHANGE FACTOR 8 (ROPGEF8)
AT3G13065	AT3G13065.1	-2.34015	1.57179e-06	STRUBBELIG-receptor family 4 (SRF4); FUNCTIONS IN: protein serine/threonine kinase activity, kinase activity, ATP binding; INVOLVED IN: transmembrane receptor protein tyrosine kinase signaling pathway, protein amino acid phosphorylation; LOCATED IN: endomembrane system; EXPRESSED IN: 7 plant structures; EXPRESSED DURING: L mature pollen stage, M germinated pollen stage, 4 anthesis, petal differen…	protein_coding	STRUBBELIG-RECEPTOR FAMILY 4 (SRF4)	STRUBBELIG-RECEPTOR FAMILY 4 (SRF4)
AT3G45280	AT3G45280.1	-2.32928	0.000887202	syntaxin of plants 72 (SYP72)	protein_coding	SYNTAXIN OF PLANTS 72 (SYP72)	SYNTAXIN OF PLANTS 72 (SYP72); (ATSYP72)
AT5G14870	AT5G14870.1	-2.32919	0.000393788	Encodes a member of the cyclic nucleotide gated channel family that is asymmetrically localized to the plasma membrane at the growing tip of the pollen tube and is involved in pollen tube growth and pollen tube guidance to ovules. It likely directly transduces a cNMP signal into an ion flux that can produce a localized signal capable of regulating the pollen tip-growth machinery. Also functions a…	protein_coding	CYCLIC NUCLEOTIDE-GATED CHANNEL 18 (CNGC18)	CYCLIC NUCLEOTIDE-GATED CHANNEL 18 (CNGC18);CYCLIC NUCLEOTIDE-GATED CHANNEL 18 (ATCNGC18)
AT3G07840	AT3G07840.1	-2.32879	2.41755e-09	Pectin lyase-like superfamily protein; FUNCTIONS IN: polygalacturonase activity; INVOLVED IN: carbohydrate metabolic process; LOCATED IN: endomembrane system; EXPRESSED IN: petal, leaf whorl, male gametophyte, flower; EXPRESSED DURING: L mature pollen stage, M germinated pollen stage, 4 anthesis, petal differentiation and expansion stage; CONTAINS InterPro DOMAIN/s: Pectin lyase fold/virulence fa…	protein_coding
AT3G13227	AT3G13227.1	-2.3058	0.0141936	serine-rich protein-related; BEST Arabidopsis thaliana protein match is: serine-rich protein-related (TAIR:AT5G55980.1)	protein_coding
AT1G04500	AT1G04500.1	-2.29943	3.17698e-05	CCT motif family protein; CONTAINS InterPro DOMAIN/s: CCT domain (InterPro:IPR010402); BEST Arabidopsis thaliana protein match is: CCT motif family protein (TAIR:AT2G33350.2)	protein_coding
AT1G03620	AT1G03620.1	-2.29744	1.18776e-07	ELMO/CED-12 family protein; FUNCTIONS IN: molecular_function unknown; INVOLVED IN: phagocytosis; LOCATED IN: cytoskeleton; EXPRESSED IN: 16 plant structures; EXPRESSED DURING: 6 growth stages; CONTAINS InterPro DOMAIN/s: Engulfment/cell motility, ELMO (InterPro:IPR006816); BEST Arabidopsis thaliana protein match is: ELMO/CED-12 family protein (TAIR:AT3G03610.1)	protein_coding
AT5G25880	AT5G25880.1	-2.29517	6.16634e-08	The malic enzyme (EC 1.1.1.40) encoded by the ATNADP-ME3 is presumably cytosolic and restricted in its expression by both developmental and cell-specific signals.	protein_coding	NADP-MALIC ENZYME 3 (NADP-ME3)	ARABIDOPSIS THALIANA NADP-MALIC ENZYME 3 (ATNADP-ME3);NADP-MALIC ENZYME 3 (NADP-ME3)
AT4G13240	AT4G13240.1	-2.28879	0.0100512	Encodes a member of KPP-like gene family, homolog of KPP (kinase partner protein) gene in tomato. Also a member of the RopGEF (guanine nucleotide exchange factor) family, containing the novel PRONE domain (plant-specific Rop nucleotide exchanger), which is exclusively active towards members of the Rop subfamily.	protein_coding	ROP (RHO OF PLANTS) GUANINE NUCLEOTIDE EXCHANGE FACTOR 9 (ROPGEF9)	(ATROPGEF9);ROP (RHO OF PLANTS) GUANINE NUCLEOTIDE EXCHANGE FACTOR 9 (ROPGEF9)
AT1G72850	AT1G72850.1	-2.28684	0.00690306	Disease resistance protein (TIR-NBS class); FUNCTIONS IN: transmembrane receptor activity, ATP binding; INVOLVED IN: signal transduction, defense response, apoptosis, innate immune response; LOCATED IN: intrinsic to membrane; EXPRESSED IN: 16 plant structures; EXPRESSED DURING: 11 growth stages; CONTAINS InterPro DOMAIN/s: NB-ARC (InterPro:IPR002182), Disease resistance protein (InterPro:IPR00076…	protein_coding
AT4G24580	AT4G24580.1	-2.27849	0.0043195	Encodes a Rho GTPase-activating protein that interacts with ROP1 (a Rho GTPase) and regulates pollen tube development. This protein can be observed at the apical tip of growing pollen tubes and on endocytic vesicles traveling to this region of the pollen tube.	protein_coding	ROP1 ENHANCER 1 (REN1)	ROP1 ENHANCER 1 (REN1)
AT4G29340	AT4G29340.1	-2.27306	5.00231e-06	Profilin is a low-molecular weight, actin monomer-binding protein that regulates the organization of actin cytoskeleton in eukaryotes, including higher plants. PRF4 and PRF5 are late pollen-specific and are not detectable in other cell types of the plant body including microspores and root hairs. Immunocytochemical studies at the subcellular level reveal that both the constitutive and pollen-spec…	protein_coding	PROFILIN 4 (PRF4)	PROFILIN 4 (PRF4); (ATPRF4)
AT1G80660	AT1G80660.1	-2.27009	0.0226291	H(+)-ATPase 9 (HA9); FUNCTIONS IN: hydrogen-exporting ATPase activity, phosphorylative mechanism; INVOLVED IN: proton transport; LOCATED IN: plasma membrane; EXPRESSED IN: 12 plant structures; EXPRESSED DURING: L mature pollen stage, M germinated pollen stage, 4 anthesis, petal differentiation and expansion stage; CONTAINS InterPro DOMAIN/s: ATPase, P-type, ATPase-associated domain (InterPro:IPR0…	protein_coding	H(+)-ATPASE 9 (HA9)	H(+)-ATPASE 9 (HA9);H(+)-ATPASE 9 (AHA9)
AT3G52780	AT3G52780.1	-2.26906	0.0457173	PAP20; FUNCTIONS IN: protein serine/threonine phosphatase activity, acid phosphatase activity; INVOLVED IN: biological_process unknown; LOCATED IN: endomembrane system; EXPRESSED IN: 10 plant structures; EXPRESSED DURING: 4 anthesis, petal differentiation and expansion stage; CONTAINS InterPro DOMAIN/s: Metallophosphoesterase (InterPro:IPR004843), Purple acid phosphatase-like, N-terminal (InterPr…	protein_coding	(PAP20)	(ATPAP20); (PAP20)
AT3G18360	AT3G18360.1	-2.25982	0.0145633	VQ motif-containing protein; CONTAINS InterPro DOMAIN/s: VQ (InterPro:IPR008889); BEST Arabidopsis thaliana protein match is: VQ motif-containing protein (TAIR:AT1G68450.1)	protein_coding
AT5G37670	AT5G37670.1	-2.2561	0.0398528	HSP20-like chaperones superfamily protein; CONTAINS InterPro DOMAIN/s: Heat shock protein Hsp20 (InterPro:IPR002068), HSP20-like chaperone (InterPro:IPR008978); BEST Arabidopsis thaliana protein match is: HSP20-like chaperones superfamily protein (TAIR:AT1G59860.1)	protein_coding
AT1G80100	AT1G80100.1	-2.24227	2.25863e-06	AHP6 lacks the conserved histidine residue (Asn83 in AHP6b), which is required for phosphotransfer, present in the other AHPs. AHP6 does not appear to have phosphotransfer activity. Acts as an inhibitor of cytokinin signaling by interacting with the phosphorelay machinery. Expressed in developing protoxylem and associated pericycle cell files. Negative regulator of cytokinin signaling. Expression…	protein_coding	HISTIDINE PHOSPHOTRANSFER PROTEIN 6 (HP6)	HISTIDINE PHOSPHOTRANSFER PROTEIN 6 (AHP6);HISTIDINE PHOSPHOTRANSFER PROTEIN 6 (HP6)
AT5G38760	AT5G38760.1	-2.23938	3.72949e-09	Late embryogenesis abundant protein (LEA) family protein; BEST Arabidopsis thaliana protein match is: Late embryogenesis abundant protein (LEA) family protein (TAIR:AT5G53820.1)	protein_coding
AT5G42170	AT5G42170.1	-2.23882	2.71029e-05	SGNH hydrolase-type esterase superfamily protein; FUNCTIONS IN: hydrolase activity, acting on ester bonds, carboxylesterase activity; INVOLVED IN: lipid metabolic process; EXPRESSED IN: 11 plant structures; EXPRESSED DURING: L mature pollen stage, 4 anthesis, petal differentiation and expansion stage; CONTAINS InterPro DOMAIN/s: Lipase, GDSL (InterPro:IPR001087), Esterase, SGNH hydrolase-type (In…	protein_coding
AT2G45800	AT2G45800.1	-2.23752	0.0487329	Encodes a member of the Arabidopsis LIM proteins: a family of actin bundlers with distinct expression patterns. WLIM1, WLIM2a, and WLIM2b are widely expressed, whereas PLIM2a, PLIM2b, and PLIM2c are predominantly expressed in pollen. Regulates actin cytoskeleton organization.	protein_coding	PLIM2A (PLIM2a)	PLIM2A (PLIM2a)
AT2G25890	AT2G25890.1	-2.22621	1.20111e-06	Oleosin family protein; FUNCTIONS IN: molecular_function unknown; INVOLVED IN: lipid storage; LOCATED IN: monolayer-surrounded lipid storage body, integral to membrane, membrane; EXPRESSED IN: petal, leaf whorl, flower, carpel; EXPRESSED DURING: 4 anthesis, petal differentiation and expansion stage; CONTAINS InterPro DOMAIN/s: Oleosin (InterPro:IPR000136); BEST Arabidopsis thaliana protein match …	protein_coding
AT1G22760	AT1G22760.1	-2.22397	0.00605398	Putative poly(A) binding protein May there fore function in posttranscriptional regulation, including mRNA turnover and translational initiation. Expression detected only in floral organs.	protein_coding	POLY(A) BINDING PROTEIN 3 (PAB3)	POLY(A) BINDING PROTEIN 3 (PAB3)
AT5G16460	AT5G16460.1	-2.22268	0.0077719	Putative adipose-regulatory protein (Seipin); CONTAINS InterPro DOMAIN/s: Adipose-regulatory protein, Seipin (InterPro:IPR009617); BEST Arabidopsis thaliana protein match is: Putative adipose-regulatory protein (Seipin) (TAIR:AT2G34380.1)	protein_coding	SEIPIN1 (SEIPIN1)	SEIPIN1 (SEIPIN1)
AT4G20680	AT4G20680.1	-2.21498	0.00690306	Domain of unknown function (DUF26); FUNCTIONS IN: molecular_function unknown; INVOLVED IN: biological_process unknown; LOCATED IN: endomembrane system; CONTAINS InterPro DOMAIN/s: Protein of unknown function DUF26 (InterPro:IPR002902); BEST Arabidopsis thaliana protein match is: Domain of unknown function (DUF26) (TAIR:AT3G22000.1)	protein_coding
AT1G08730	AT1G08730.1	-2.21292	0.0122772	Encodes a class XI myosin that is involved in organelle motility, actin organization, and optimal growth of pollen tubes.	protein_coding	(XIC)	(XIC);MYOSIN XI C (ATXIC)
AT3G55180	AT3G55180.1	-2.2089	8.14701e-06	alpha/beta-Hydrolases superfamily protein; BEST Arabidopsis thaliana protein match is: alpha/beta-Hydrolases superfamily protein (TAIR:AT2G39400.1)	protein_coding	(MAGL10)	(MAGL10)
AT3G16150	AT3G16150.1	-2.20883	0.0002869	Encodes an asparaginase that catalyzes the degradation of L-asparagine to L-aspartic acid and ammonia. The mRNA is cell-to-cell mobile.	protein_coding	ASPARAGINASE B1 (ASPGB1)	ASPARAGINASE B1 (ASPGB1)
AT3G28830	AT3G28830.1	-2.20717	0.00236498	Protein of unknown function (DUF1216); INVOLVED IN: biological_process unknown; LOCATED IN: endomembrane system; EXPRESSED IN: 9 plant structures; EXPRESSED DURING: L mature pollen stage, M germinated pollen stage, 4 anthesis, C globular stage, petal differentiation and expansion stage; CONTAINS InterPro DOMAIN/s: Protein of unknown function DUF1216 (InterPro:IPR009605); BEST Arabidopsis thaliana…	protein_coding
AT2G33270	AT2G33270.1	-2.19777	0.000434056	Encodes a member of the thioredoxin family protein. Located in the chloroplast.	protein_coding	ATYPICAL CYS HIS RICH THIOREDOXIN 3 (ACHT3)	ATYPICAL CYS HIS RICH THIOREDOXIN 3 (ACHT3)
AT5G15600	AT5G15600.1	-2.19748	3.92684e-05	SPIRAL1-LIKE4 belongs to a six-member gene family in Arabidopsis; all members share high sequence similarity in amino- and carboxy-terminal regions. Regulates cortical microtubule organization. Mutant plants exhibit altered patterns of root, leaf and petal growth as a result of defective anisotropic cell expansion.	protein_coding	SPIRAL1-LIKE4 (SP1L4)	SPIRAL1-LIKE4 (SP1L4)
AT1G52570	AT1G52570.1	-2.19637	0.000999442	member of C2-PLD subfamily	protein_coding	PHOSPHOLIPASE D ALPHA 2 (PLDALPHA2)	PHOSPHOLIPASE D ALPHA 2 (PLDALPHA2)
AT1G79450	AT1G79450.1	-2.19303	5.53748e-07	ALA-interacting subunit 5 (ALIS5); INVOLVED IN: biological_process unknown; LOCATED IN: chloroplast thylakoid lumen, plasma membrane, membrane; EXPRESSED IN: 12 plant structures; EXPRESSED DURING: L mature pollen stage, M germinated pollen stage, 4 anthesis, petal differentiation and expansion stage; CONTAINS InterPro DOMAIN/s: Protein of unknown function DUF284, transmembrane eukaryotic (InterPr…	protein_coding	ALA-INTERACTING SUBUNIT 5 (ALIS5)	ALA-INTERACTING SUBUNIT 5 (ALIS5)
AT2G29790	AT2G29790.1	-2.17482	0.0043195	Encodes a Maternally expressed gene (MEG) family protein [pseudogene]	protein_coding
AT1G16760	AT1G16760.1	-2.16943	0.0412292	Protein kinase protein with adenine nucleotide alpha hydrolases-like domain; FUNCTIONS IN: protein serine/threonine kinase activity, protein kinase activity, kinase activity, ATP binding; INVOLVED IN: protein amino acid phosphorylation, response to stress; LOCATED IN: cellular_component unknown; EXPRESSED IN: male gametophyte, flower, pollen tube; EXPRESSED DURING: L mature pollen stage, M germin…	protein_coding
AT5G46200	AT5G46200.1	-2.16813	0.00861527	Protein of Unknown Function (DUF239); FUNCTIONS IN: molecular_function unknown; INVOLVED IN: biological_process unknown; LOCATED IN: endomembrane system; EXPRESSED IN: petal, leaf whorl, male gametophyte, flower, pollen tube; EXPRESSED DURING: L mature pollen stage, M germinated pollen stage, 4 anthesis, petal differentiation and expansion stage; CONTAINS InterPro DOMAIN/s: Protein of unknown fun…	protein_coding
AT1G10455	AT1G10455.1	-2.16807	0.0281757	unknown protein; BEST Arabidopsis thaliana protein match is: unknown protein (TAIR:AT1G51970.1)	protein_coding
AT3G51070	AT3G51070.1	-2.16575	0.0043195	S-adenosyl-L-methionine-dependent methyltransferases superfamily protein; CONTAINS InterPro DOMAIN/s: Protein of unknown function DUF248, methyltransferase putative (InterPro:IPR004159); BEST Arabidopsis thaliana protein match is: S-adenosyl-L-methionine-dependent methyltransferases superfamily protein (TAIR:AT5G64030.1)	protein_coding
AT3G12860	AT3G12860.1	-2.16071	9.25719e-07	NOP56-like pre RNA processing ribonucleoprotein; CONTAINS InterPro DOMAIN/s: Pre-mRNA processing ribonucleoprotein, snoRNA-binding domain (InterPro:IPR002687), NOP5, N-terminal (InterPro:IPR012974), NOSIC (InterPro:IPR012976); BEST Arabidopsis thaliana protein match is: homolog of nucleolar protein NOP56 (TAIR:AT1G56110.1)	protein_coding
AT5G46940	AT5G46940.1	-2.15403	0.0033939	Plant invertase/pectin methylesterase inhibitor superfamily protein; FUNCTIONS IN: enzyme inhibitor activity, pectinesterase inhibitor activity, pectinesterase activity; INVOLVED IN: biological_process unknown; LOCATED IN: endomembrane system; EXPRESSED IN: 6 plant structures; EXPRESSED DURING: 4 anthesis, petal differentiation and expansion stage; CONTAINS InterPro DOMAIN/s: Pectinesterase inhib…	protein_coding
AT5G54780	AT5G54780.1	-2.1514	4.88138e-07	Ypt/Rab-GAP domain of gyp1p superfamily protein; FUNCTIONS IN: RAB GTPase activator activity; INVOLVED IN: regulation of Rab GTPase activity; LOCATED IN: mitochondrion; EXPRESSED IN: 24 plant structures; EXPRESSED DURING: 15 growth stages; CONTAINS InterPro DOMAIN/s: RabGAP/TBC (InterPro:IPR000195); BEST Arabidopsis thaliana protein match is: Ypt/Rab-GAP domain of gyp1p superfamily protein (TAIR:…	protein_coding
AT2G16730	AT2G16730.1	-2.13687	0.0033939	putative beta-galactosidase (BGAL13 gene)	protein_coding	(BGAL13)	(BGAL13);BETA-GALACTOSIDASE 13 (BGAL13)
AT4G10220	AT4G10220.1	-2.13479	0.00100834	Protein of Unknown Function (DUF239); INVOLVED IN: biological_process unknown; LOCATED IN: endomembrane system; EXPRESSED IN: central cell, male gametophyte; EXPRESSED DURING: L mature pollen stage; CONTAINS InterPro DOMAIN/s: Protein of unknown function DUF239, plant (InterPro:IPR004314); BEST Arabidopsis thaliana protein match is: Protein of Unknown Function (DUF239) (TAIR:AT4G10210.1)	protein_coding
AT5G66740	AT5G66740.1	-2.13319	0.0134446	Protein of unknown function (DUF620); CONTAINS InterPro DOMAIN/s: Protein of unknown function DUF620 (InterPro:IPR006873); BEST Arabidopsis thaliana protein match is: Protein of unknown function (DUF620) (TAIR:AT1G75160.1)	protein_coding
AT5G22900	AT5G22900.1	-2.13294	0.00236498	member of Putative Na+/H+ antiporter family	protein_coding	CATION/H+ EXCHANGER 3 (CHX3)	ARABIDOPSIS THALIANA CATION/H+ EXCHANGER 3 (ATCHX3);CATION/H+ EXCHANGER 3 (CHX3)
AT5G20410	AT5G20410.1	-2.12989	0.0202756	Encodes a type B monogalactosyldiacylglycerol (MGDG) synthase. Strongly induced by phosphate deprivation, and in non-photosynthetic tissues. Does not contribute to galactolipid synthesis under Pi-sufficient conditions but does under Pi starvation.	protein_coding	MONOGALACTOSYLDIACYLGLYCEROL SYNTHASE 2 (MGD2)	MONOGALACTOSYLDIACYLGLYCEROL SYNTHASE 2 (MGD2);ARABIDOPSIS THALIANA MONOGALACTOSYLDIACYLGLYCEROL SYNTHASE 2 (ATMGD2)
AT2G46300	AT2G46300.1	-2.12078	0.0244772	Late embryogenesis abundant (LEA) hydroxyproline-rich glycoprotein family; CONTAINS InterPro DOMAIN/s: Late embryogenesis abundant protein, group 2 (InterPro:IPR004864); BEST Arabidopsis thaliana protein match is: unknown protein (TAIR:AT4G01110.1)	protein_coding
AT5G03210	AT5G03210.1	-2.11223	0.0232293	Encodes a small polypeptide contributing to resistance to potyvirus.	protein_coding	DBP-INTERACTING PROTEIN 2 (DIP2)	DBP-INTERACTING PROTEIN 2 (DIP2); (ATDIP2)
AT2G47190	AT2G47190.1	-2.10336	0.0145633	Encodes a MYB transcription factor that possesses an R2R3 MYB DNA binding domain and is known to regulate the expression of salt- and dehydration-responsive genes. Has been shown to bind calmodulin.	protein_coding	MYB DOMAIN PROTEIN 2 (MYB2)	MYB DOMAIN PROTEIN 2 (ATMYB2);MYB DOMAIN PROTEIN 2 (MYB2)
AT4G25590	AT4G25590.1	-2.10079	0.0190474	actin depolymerizing factor 7 (ADF7); FUNCTIONS IN: actin binding; INVOLVED IN: biological_process unknown; LOCATED IN: intracellular; EXPRESSED IN: 8 plant structures; EXPRESSED DURING: L mature pollen stage, M germinated pollen stage, 4 anthesis, C globular stage, petal differentiation and expansion stage; CONTAINS InterPro DOMAIN/s: Actin-binding, cofilin/tropomyosin type (InterPro:IPR002108);…	protein_coding	ACTIN DEPOLYMERIZING FACTOR 7 (ADF7)	ACTIN DEPOLYMERIZING FACTOR 7 (ADF7)
AT1G09500	AT1G09500.1	-2.09731	0.000519294	similar to Eucalyptus gunnii alcohol dehydrogenase of unknown physiological function (GI:1143445), Vigna unguiculata (gi:1854445), NOT a cinnamyl-alcohol dehydrogenase	protein_coding
AT4G35770	AT4G35770.1	-2.09572	5.53748e-07	Senescence-associated gene that is strongly induced by phosphate starvation. Transcripts are differentially regulated at the level of mRNA stability at different times of day. mRNAs are targets of the mRNA degradation pathway mediated by the downstream (DST) instability determinant.	protein_coding	SENESCENCE 1 (SEN1)	SENESCENCE 1 (SEN1);SENESCENCE ASSOCIATED GENE 1 (SEN1);ARABIDOPSIS THALIANA SENESCENCE 1 (ATSEN1);DARK INDUCIBLE 1 (DIN1)
AT4G27350	AT4G27350.1	-2.08484	6.54678e-11	Protein of unknown function (DUF1223); CONTAINS InterPro DOMAIN/s: Protein of unknown function DUF1223 (InterPro:IPR010634); BEST Arabidopsis thaliana protein match is: Protein of unknown function (DUF1223) (TAIR:AT5G54240.1)	protein_coding
AT4G25950	AT4G25950.1	-2.08157	0.00605398	V-ATPase G-subunit like protein	protein_coding	VACUOLAR ATP SYNTHASE G3 (VATG3)	VACUOLAR ATP SYNTHASE G3 (VATG3)
AT3G46750	AT3G46750.1	-2.08138	0.000389915	unknown protein	protein_coding
AT1G52680	AT1G52680.1	-2.06795	9.14928e-06	late embryogenesis abundant protein-related / LEA protein-related	protein_coding
AT1G73630	AT1G73630.1	-2.067	1.37717e-07	EF hand calcium-binding protein family; FUNCTIONS IN: calcium ion binding; INVOLVED IN: biological_process unknown; LOCATED IN: cytoplasm; EXPRESSED IN: 24 plant structures; EXPRESSED DURING: 14 growth stages; CONTAINS InterPro DOMAIN/s: EF-Hand 1, calcium-binding site (InterPro:IPR018247), EF-HAND 2 (InterPro:IPR018249), EF-hand-like domain (InterPro:IPR011992), Calcium-binding EF-hand (InterPro…	protein_coding
AT2G19770	AT2G19770.1	-2.06435	9.13625e-06	Encodes profilin 5, originally named profilin 4 (PRO4/PFN4). Low-molecular weight, actin monomer-binding protein that regulates the organization of actin cytoskeleton. Pollen-specific plant profilin present predominantly in mature pollen and growing pollen tubes.	protein_coding	PROFILIN 5 (PRF5)	PROFILIN 5 (PRF5)
AT4G01470	AT4G01470.1	-2.05851	0.0487329	Encodes AtTIP1;3, functions as water and urea channels in pollen.	protein_coding	TONOPLAST INTRINSIC PROTEIN 1;3 (TIP1;3)	(GAMMA-TIP3);TONOPLAST INTRINSIC PROTEIN 1;3 (TIP1;3); (ATTIP1.3)
AT3G61760	AT3G61760.1	-2.05815	0.00605398	DYNAMIN-like 1B (DL1B); FUNCTIONS IN: GTP binding, GTPase activity; EXPRESSED IN: 10 plant structures; EXPRESSED DURING: 6 growth stages; CONTAINS InterPro DOMAIN/s: Dynamin GTPase effector (InterPro:IPR003130), Dynamin, GTPase domain (InterPro:IPR001401), Dynamin, GTPase region, conserved site (InterPro:IPR019762), GTPase effector domain, GED (InterPro:IPR020850), Dynamin central region (InterPr…	protein_coding	DYNAMIN-LIKE 1B (DL1B)	DYNAMIN-LIKE 1B (DL1B);DYNAMIN-LIKE 1B (ADL1B)
AT2G30290	AT2G30290.2	-2.05164	0.0365729	VACUOLAR SORTING RECEPTOR 2 (VSR2); FUNCTIONS IN: calcium ion binding; INVOLVED IN: protein targeting to vacuole; LOCATED IN: integral to plasma membrane, Golgi transport complex; EXPRESSED IN: petal, leaf whorl, male gametophyte, flower, pollen tube; EXPRESSED DURING: L mature pollen stage, M germinated pollen stage, 4 anthesis, petal differentiation and expansion stage; CONTAINS InterPro DOMAIN…	protein_coding	VACUOLAR SORTING RECEPTOR 2 (VSR2)	VACUOLAR SORTING RECEPTOR 2 (VSR2); (AtVSR2)
AT3G07850	AT3G07850.1	-2.04141	8.66094e-15	Pectin lyase-like superfamily protein; FUNCTIONS IN: polygalacturonase activity; INVOLVED IN: carbohydrate metabolic process; LOCATED IN: endomembrane system; EXPRESSED IN: male gametophyte, pollen tube; EXPRESSED DURING: L mature pollen stage, M germinated pollen stage; CONTAINS InterPro DOMAIN/s: Pectin lyase fold/virulence factor (InterPro:IPR011050), Pectin lyase fold (InterPro:IPR012334), Gl…	protein_coding
AT5G14670	AT5G14670.1	-2.0402	0.0324077	A member of ARF GTPase family. Arabidopsis has 21 members of this family, known to be essential for vesicle coating and uncoating and functions in GTP-binding. Gene encoding ADP-ribosylation factor and similar to ADP-ribosylation factor DcARF1 (GI:965483) (Daucus carota), other ARFs and ARF-like proteins. The gene is shown to play a role in cell division, cell expansion and cellulose production u…	protein_coding	ADP-RIBOSYLATION FACTOR A1B (ARFA1B)	ADP-RIBOSYLATION FACTOR A1B (ATARFA1B);ADP-RIBOSYLATION FACTOR A1B (ARFA1B)
AT1G48740	AT1G48740.2	-2.03938	0.0416613	2-oxoglutarate (2OG) and Fe(II)-dependent oxygenase superfamily protein; FUNCTIONS IN: oxidoreductase activity, acting on paired donors, with incorporation or reduction of molecular oxygen, L-ascorbic acid binding, iron ion binding; INVOLVED IN: oxidation reduction; LOCATED IN: cellular_component unknown; CONTAINS InterPro DOMAIN/s: Prolyl 4-hydroxylase, alpha subunit (InterPro:IPR006620); BEST A…	protein_coding
AT2G13570	AT2G13570.1	-2.03712	0.000785289	nuclear factor Y, subunit B7 (NF-YB7); FUNCTIONS IN: sequence-specific DNA binding transcription factor activity; INVOLVED IN: regulation of transcription, DNA-dependent; LOCATED IN: nucleus, intracellular; EXPRESSED IN: 8 plant structures; EXPRESSED DURING: L mature pollen stage, M germinated pollen stage, 4 anthesis, petal differentiation and expansion stage; CONTAINS InterPro DOMAIN/s: Transcr…	protein_coding	NUCLEAR FACTOR Y, SUBUNIT B7 (NF-YB7)	NUCLEAR FACTOR Y, SUBUNIT B7 (NF-YB7)
AT5G19600	AT5G19600.1	-2.03277	0.0404516	Encodes sulfate transporter Sultr3;5.	protein_coding	SULFATE TRANSPORTER 3;5 (SULTR3;5)	SULFATE TRANSPORTER 3;5 (SULTR3;5)
AT3G28810	AT3G28810.1	-2.03211	2.34572e-08	Protein of unknown function (DUF1216); FUNCTIONS IN: molecular_function unknown; INVOLVED IN: biological_process unknown; LOCATED IN: endomembrane system; EXPRESSED IN: male gametophyte, pollen tube; EXPRESSED DURING: L mature pollen stage, M germinated pollen stage; CONTAINS InterPro DOMAIN/s: Protein of unknown function DUF1216 (InterPro:IPR009605); BEST Arabidopsis thaliana protein match is: P…	protein_coding
AT3G54510	AT3G54510.2	-2.02847	0.0100512	Early-responsive to dehydration stress protein (ERD4); LOCATED IN: membrane; EXPRESSED IN: 18 plant structures; EXPRESSED DURING: 8 growth stages; CONTAINS InterPro DOMAIN/s: Protein of unknown function DUF221 (InterPro:IPR003864); BEST Arabidopsis thaliana protein match is: hypothetical protein 1 (TAIR:AT3G01100.1)	protein_coding
AT4G20160	AT4G20160.1	-2.02722	0.00605398	LOCATED IN: chloroplast; EXPRESSED IN: 6 plant structures; EXPRESSED DURING: L mature pollen stage, M germinated pollen stage, 4 anthesis, petal differentiation and expansion stage; BEST Arabidopsis thaliana protein match is: RING/U-box superfamily protein (TAIR:AT1G30860.1)	protein_coding
AT5G14890	AT5G14890.1	-2.02554	0.0115554	NHL domain-containing protein; LOCATED IN: endomembrane system; EXPRESSED IN: 7 plant structures; EXPRESSED DURING: L mature pollen stage, M germinated pollen stage, 4 anthesis, petal differentiation and expansion stage; CONTAINS InterPro DOMAIN/s: NHL repeat (InterPro:IPR001258), Six-bladed beta-propeller, TolB-like (InterPro:IPR011042); BEST Arabidopsis thaliana protein match is: NHL domain-con…	protein_coding
AT1G50310	AT1G50310.1	-2.02307	0.000714672	sugar transporter 9 (STP9); FUNCTIONS IN: carbohydrate transmembrane transporter activity, sugar:hydrogen symporter activity; INVOLVED IN: transport, transmembrane transport; LOCATED IN: integral to membrane, membrane; EXPRESSED IN: 16 plant structures; EXPRESSED DURING: 8 growth stages; CONTAINS InterPro DOMAIN/s: Sugar transporter, conserved site (InterPro:IPR005829), Major facilitator superfam…	protein_coding	SUGAR TRANSPORTER 9 (STP9)	SUGAR TRANSPORTER 9 (ATSTP9);SUGAR TRANSPORTER 9 (STP9)
AT3G07820	AT3G07820.1	-2.01939	0.0389355	Pectin lyase-like superfamily protein; FUNCTIONS IN: polygalacturonase activity; INVOLVED IN: carbohydrate metabolic process; LOCATED IN: endomembrane system; EXPRESSED IN: 11 plant structures; EXPRESSED DURING: L mature pollen stage, M germinated pollen stage, 4 anthesis, C globular stage, petal differentiation and expansion stage; CONTAINS InterPro DOMAIN/s: Pectin lyase fold/virulence factor (…	protein_coding
AT3G21700	AT3G21700.3	-2.01868	0.0438683	Monomeric G protein. Expressed in root epidermal cells that are destined to become atrichoblasts. Also expressed during pollen development and in the pollen tube tip.	protein_coding	(SGP2)	(SGP2)
AT4G11810	AT4G11810.1	-2.01536	0.0145633	Encodes an SPX domain protein that transports Pi into the vacuole. Overexpression of PHT5:2 leads to massive Pi sequestration into vacuoles and altered regulation of Pi starvation-responsive genes.	protein_coding	(PHT5;2)	(PHT5;2)
AT2G18470	AT2G18470.1	-2.01276	5.24702e-05	Proline-rich extensin-like receptor kinase 4. Functions at an early stage of ABA signalling inhibiting primary root cell elongation by perturbing Ca2+ homeostasis.	protein_coding	PROLINE-RICH EXTENSIN-LIKE RECEPTOR KINASE 4 (PERK4)	PROLINE-RICH EXTENSIN-LIKE RECEPTOR KINASE 4 (PERK4);PROLINE-RICH EXTENSIN-LIKE RECEPTOR KINASE 4 (AtPERK4)
AT1G63930	AT1G63930.1	-2.01093	0.0178356	from the Czech 'roh' meaning 'corner' (ROH1); CONTAINS InterPro DOMAIN/s: Protein BYPASS related (InterPro:IPR008511); BEST Arabidopsis thaliana protein match is: Protein of unknown function (DUF793) (TAIR:AT4G23530.1)	protein_coding	FROM THE CZECH 'ROH' MEANING 'CORNER' (ROH1)	FROM THE CZECH 'ROH' MEANING 'CORNER' (ROH1)
AT1G32320	AT1G32320.1	2.00194	0.0141936	member of MAP Kinase Kinase	protein_coding	MAP KINASE KINASE 10 (MKK10)	MAP KINASE KINASE 10 (ATMKK10);MAP KINASE KINASE 10 (MKK10)
AT4G11540	AT4G11540.1	2.02483	0.0335214	Cysteine/Histidine-rich C1 domain family protein; INVOLVED IN: intracellular signaling pathway; LOCATED IN: endomembrane system; CONTAINS InterPro DOMAIN/s: Protein kinase C-like, phorbol ester/diacylglycerol binding (InterPro:IPR002219), DC1 (InterPro:IPR004146), C1-like (InterPro:IPR011424); BEST Arabidopsis thaliana protein match is: Cysteine/Histidine-rich C1 domain family protein (TAIR:AT4G1…	protein_coding
AT2G16005	AT2G16005.1	2.11644	0.0134446	ROSY1 protein contains a MD-2-related lipid-recognition domain. It is rapidly upregulated in response to gravistimulation.	protein_coding	INTERACTOR OF SYNAPTOTAGMIN1 (ROSY1)	INTERACTOR OF SYNAPTOTAGMIN1 (ROSY1)
AT1G14480	AT1G14480.1	2.16314	0.000224436	Ankyrin repeat family protein; CONTAINS InterPro DOMAIN/s: Ankyrin repeat-containing domain (InterPro:IPR020683), Ankyrin repeat (InterPro:IPR002110); BEST Arabidopsis thaliana protein match is: Ankyrin repeat family protein (TAIR:AT1G14500.1)	protein_coding
AT5G15360	AT5G15360.1	2.18691	0.00236498	unknown protein	protein_coding
AT4G38420	AT4G38420.1	2.25994	0.0318864	SKU5 similar 9 (sks9); FUNCTIONS IN: oxidoreductase activity, copper ion binding; INVOLVED IN: oxidation reduction; LOCATED IN: plant-type cell wall; EXPRESSED IN: 12 plant structures; EXPRESSED DURING: 9 growth stages; CONTAINS InterPro DOMAIN/s: Multicopper oxidase, type 3 (InterPro:IPR011707), Cupredoxin (InterPro:IPR008972), Multicopper oxidase, type 2 (InterPro:IPR011706), Multicopper oxidas…	protein_coding	SKU5 SIMILAR 9 (sks9)	SKU5 SIMILAR 9 (sks9)
AT4G05380	AT4G05380.1	2.27235	0.0238889	P-loop containing nucleoside triphosphate hydrolases superfamily protein; FUNCTIONS IN: nucleoside-triphosphatase activity, ATPase activity, nucleotide binding, ATP binding; INVOLVED IN: biological_process unknown; LOCATED IN: cellular_component unknown; CONTAINS InterPro DOMAIN/s: ATPase, AAA-type, core (InterPro:IPR003959), ATPase, AAA+ type, core (InterPro:IPR003593), ATPase, AAA-type, conserv…	protein_coding
AT5G20650	AT5G20650.1	2.3735	0.0483491	Encodes COPT5, a member of copper transporter family and functionally complements a high affinity copper transporter mutant in yeast. Plays an important role in the plant response to environmental copper scarcity, probably by remobilizing copper from prevacuolar vesicles, which could act as internal stores or recycling vesicles to provide the metal cofactor to key copper-dependent processes such …	protein_coding	COPPER TRANSPORTER 5 (COPT5)	COPPER TRANSPORTER 5 (COPT5); (ATCOPT5)
AT2G02850	AT2G02850.1	2.38163	6.64896e-08	Encodes plantacyanin one of blue copper proteins. Involved in anther development and pollination. Expressed in the transmitting tract of the pistil.	protein_coding	PLANTACYANIN (ARPN)	PLANTACYANIN (ARPN)
AT3G14030	AT3G14030.1	2.38932	0.0202756	F-box associated ubiquitination effector family protein; CONTAINS InterPro DOMAIN/s: F-box associated domain, type 1 (InterPro:IPR006527), F-box associated interaction domain (InterPro:IPR017451); BEST Arabidopsis thaliana protein match is: F-box and associated interaction domains-containing protein (TAIR:AT4G17200.1)	protein_coding
AT5G59530	AT5G59530.1	2.40093	0.0404516	2-oxoglutarate (2OG) and Fe(II)-dependent oxygenase superfamily protein; CONTAINS InterPro DOMAIN/s: Oxoglutarate/iron-dependent oxygenase (InterPro:IPR005123); BEST Arabidopsis thaliana protein match is: 2-oxoglutarate (2OG) and Fe(II)-dependent oxygenase superfamily protein (TAIR:AT5G59540.1)	protein_coding
AT5G46390	AT5G46390.2	2.44247	0.0393965	Peptidase S41 family protein; FUNCTIONS IN: serine-type peptidase activity; INVOLVED IN: proteolysis, intracellular signaling pathway; LOCATED IN: chloroplast thylakoid lumen; EXPRESSED IN: 21 plant structures; EXPRESSED DURING: 13 growth stages; CONTAINS InterPro DOMAIN/s: Peptidase S41 (InterPro:IPR005151), PDZ/DHR/GLGF (InterPro:IPR001478), Peptidase S41A, C-terminal peptidase (InterPro:IPR004…	protein_coding
AT2G11830	AT2G11830.1	2.47043	0.00236498	similar to unknown protein [Arabidopsis thaliana] (TAIR:AT5G47225.1); contains InterPro domain Polynucleotidyl transferase, Ribonuclease H fold; (InterPro:IPR012337)	transposable_element_gene
AT5G48320	AT5G48320.1	2.61257	0.000291396	Cysteine/Histidine-rich C1 domain family protein; CONTAINS InterPro DOMAIN/s: DC1 (InterPro:IPR004146), C1-like (InterPro:IPR011424); BEST Arabidopsis thaliana protein match is: Cysteine/Histidine-rich C1 domain family protein (TAIR:AT4G15070.1)	protein_coding
AT1G23830	AT1G23830.1	2.70981	0.0093	unknown protein; FUNCTIONS IN: molecular_function unknown; INVOLVED IN: biological_process unknown; LOCATED IN: endomembrane system; EXPRESSED IN: 12 plant structures; EXPRESSED DURING: 9 growth stages; BEST Arabidopsis thaliana protein match is: unknown protein (TAIR:AT1G23840.1)	protein_coding
AT3G14500	AT3G14500.1	2.74201	0.0307447	similar to RNase H domain-containing protein [Arabidopsis thaliana] (TAIR:AT5G36905.1); similar to hypothetical protein MtrDRAFT_AC139526g2v1 [Medicago truncatula] (GB:ABE80133.1); similar to Ribonuclease H [Medicago truncatula] (GB:ABE81233.1); contains InterPro domain Polynucleotidyl transferase, Ribonuclease H fold; (InterPro:IPR012337)	transposable_element_gene
AT3G30842	AT3G30842.1	2.85578	0.0335214	pleiotropic drug resistance 10 (PDR10); FUNCTIONS IN: nucleoside-triphosphatase activity, ATPase activity, nucleotide binding, ATP binding; INVOLVED IN: drug transmembrane transport; LOCATED IN: membrane; CONTAINS InterPro DOMAIN/s: ATPase, AAA+ type, core (InterPro:IPR003593), ABC transporter-like (InterPro:IPR003439), ABC-2 type transporter (InterPro:IPR013525); BEST Arabidopsis thaliana protei…	protein_coding	ATP-BINDING CASSETTE G38 (ABCG38)	PLEIOTROPIC DRUG RESISTANCE 10 (PDR10); (ATPDR10);ATP-BINDING CASSETTE G38 (ABCG38)
AT3G24610	AT3G24610.1	2.86826	0.000414703	Galactose oxidase/kelch repeat superfamily protein; CONTAINS InterPro DOMAIN/s: F-box domain, cyclin-like (InterPro:IPR001810), Kelch repeat type 1 (InterPro:IPR006652), Galactose oxidase/kelch, beta-propeller (InterPro:IPR011043), Kelch related (InterPro:IPR013089), Kelch-type beta propeller (InterPro:IPR015915); BEST Arabidopsis thaliana protein match is: unknown protein (TAIR:AT2G14288.1)	protein_coding
AT3G26930	AT3G26930.1	2.88353	0.0152309	Protein with RNI-like/FBD-like domains; CONTAINS InterPro DOMAIN/s: FBD (InterPro:IPR013596), FBD-like (InterPro:IPR006566), Leucine-rich repeat 2 (InterPro:IPR013101); BEST Arabidopsis thaliana protein match is: Protein with RNI-like/FBD-like domains (TAIR:AT4G13965.1)	protein_coding
AT2G11370	AT2G11370.1	2.93236	0.0108511	similar to unknown protein [Arabidopsis thaliana] (TAIR:AT3G30590.1)	transposable_element_gene
AT4G09660	AT4G09660.1	2.94563	0.0108511	CONTAINS InterPro DOMAIN/s: Zinc finger, TTF-type (InterPro:IPR006580); BEST Arabidopsis thaliana protein match is: TTF-type zinc finger protein with HAT dimerisation domain (TAIR:AT1G19260.1)	protein_coding
AT5G42590	AT5G42590.1	2.98263	0.00108228	putative cytochrome P450	protein_coding	CYTOCHROME P450, FAMILY 71, SUBFAMILY A, POLYPEPTIDE 16 (CYP71A16)	CYTOCHROME P450, FAMILY 71, SUBFAMILY A, POLYPEPTIDE 16 (CYP71A16);MARNERAL OXIDASE (MRO)
AT1G09950	AT1G09950.1	3.00779	0.0404051	RESPONSE TO ABA AND SALT 1 (RAS1); FUNCTIONS IN: molecular_function unknown; INVOLVED IN: biological_process unknown; LOCATED IN: endomembrane system; EXPRESSED IN: leaf apex, root, flower, leaf; EXPRESSED DURING: petal differentiation and expansion stage; BEST Arabidopsis thaliana protein match is: transcription factor-related (TAIR:AT1G58330.1)	protein_coding	RESPONSE TO ABA AND SALT 1 (RAS1)	RESPONSE TO ABA AND SALT 1 (RAS1)
AT5G41250	AT5G41250.1	3.0311	0.0033939	Exostosin family protein; FUNCTIONS IN: catalytic activity; INVOLVED IN: biological_process unknown; LOCATED IN: membrane; CONTAINS InterPro DOMAIN/s: Exostosin-like (InterPro:IPR004263); BEST Arabidopsis thaliana protein match is: root hair specific 8 (TAIR:AT1G63450.1)	protein_coding
AT3G09020	AT3G09020.1	3.03237	0.026912	alpha 1,4-glycosyltransferase family protein; FUNCTIONS IN: transferase activity, transferring glycosyl groups, transferase activity; INVOLVED IN: biological_process unknown; LOCATED IN: Golgi stack; EXPRESSED IN: 10 plant structures; EXPRESSED DURING: 6 growth stages; CONTAINS InterPro DOMAIN/s: Alpha 1,4-glycosyltransferase conserved region (InterPro:IPR007652), Glycosyltransferase, DXD sugar-b…	protein_coding
AT2G37440	AT2G37440.1	3.05478	3.77248e-09	DNAse I-like superfamily protein; FUNCTIONS IN: hydrolase activity, inositol or phosphatidylinositol phosphatase activity; INVOLVED IN: biological_process unknown; EXPRESSED IN: sperm cell, root; CONTAINS InterPro DOMAIN/s: Inositol polyphosphate related phosphatase (InterPro:IPR000300), Endonuclease/exonuclease/phosphatase (InterPro:IPR005135); BEST Arabidopsis thaliana protein match is: DNAse I…	protein_coding
AT1G47890	AT1G47890.1	3.08502	0.0043195	receptor like protein 7 (RLP7); FUNCTIONS IN: kinase activity; INVOLVED IN: signal transduction, defense response; LOCATED IN: endomembrane system; EXPRESSED IN: stem, stamen; EXPRESSED DURING: 4 anthesis; CONTAINS InterPro DOMAIN/s: Leucine-rich repeat-containing N-terminal domain, type 2 (InterPro:IPR013210), Leucine-rich repeat (InterPro:IPR001611); BEST Arabidopsis thaliana protein match is: …	protein_coding	RECEPTOR LIKE PROTEIN 7 (RLP7)	RECEPTOR LIKE PROTEIN 7 (AtRLP7);RECEPTOR LIKE PROTEIN 7 (RLP7)
AT2G24460	AT2G24460.1	3.22881	0.0093	BEST Arabidopsis thaliana protein match is: Zinc finger, C3HC4 type (RING finger) family protein (TAIR:AT2G24480.1)	protein_coding
AT1G51430	AT1G51430.1	3.50969	0.0184468	unknown protein; BEST Arabidopsis thaliana protein match is: unknown protein (TAIR:AT3G28370.1)	protein_coding
AT4G10500	AT4G10500.1	3.66375	0.0100512	2-oxoglutarate (2OG) and Fe(II)-dependent oxygenase superfamily protein; FUNCTIONS IN: oxidoreductase activity, acting on paired donors, with incorporation or reduction of molecular oxygen, 2-oxoglutarate as one donor, and incorporation of one atom each of oxygen into both donors, oxidoreductase activity; INVOLVED IN: secondary metabolic process; EXPRESSED IN: 12 plant structures; EXPRESSED DURIN…	protein_coding	DMR6-LIKE OXYGENASE 1 (DLO1)	DMR6-LIKE OXYGENASE 1 (DLO1)
AT4G07530	AT4G07530.1	3.70379	1.09366e-06	similar to unknown protein [Arabidopsis thaliana] (TAIR:AT3G30810.1); similar to unknown protein [Arabidopsis thaliana] (TAIR:AT4G04070.1); similar to myosin heavy chain-related [Arabidopsis thaliana] (TAIR:AT4G08113.1); similar to hypothetical protein 26.t00052 [Brassica oleracea] (GB:ABD65035.1); contains InterPro domain Protein of unknown function DUF1633; (InterPro:IPR012436)	transposable_element_gene
AT5G13060	AT5G13060.1	3.87532	1.1303e-05	Encodes a novel Armadillo BTB protein that intreacts with the pre-replication complex and several transcription factors. Overexpression results in decreased cell proliferation and loss of function results in increased cell proliferation suggesting a role in negative regulation of cellular proliferation.	protein_coding	ARMADILLO BTB PROTEIN 1 (ABAP1)	ARMADILLO BTB PROTEIN 1 (ABAP1)
AT5G39100	AT5G39100.1	4.00114	0.000196845	germin-like protein (GLP6)	protein_coding	GERMIN-LIKE PROTEIN 6 (GLP6)	GERMIN-LIKE PROTEIN 6 (GLP6)
AT3G49700	AT3G49700.1	4.42098	6.47196e-07	encodes a a member of the 1-aminocyclopropane-1-carboxylate (ACC) synthase (S-adenosyl-L-methionine methylthioadenosine-lyase, EC 4.4.1.14) gene family. Mutants produce elevated levels of ethylene as etiolated seedlings.	protein_coding	1-AMINOCYCLOPROPANE-1-CARBOXYLATE SYNTHASE 9 (ACS9)	ETHYLENE OVERPRODUCING 3 (ETO3);1-AMINOCYCLOPROPANE-1-CARBOXYLATE SYNTHASE 9 (ACS9); (AtACS9)
AT1G18960	AT1G18960.1	4.75609	0.00236498	myb-like HTH transcriptional regulator family protein; FUNCTIONS IN: DNA binding, sequence-specific DNA binding transcription factor activity; INVOLVED IN: regulation of transcription, DNA-dependent, regulation of transcription; CONTAINS InterPro DOMAIN/s: SANT, DNA-binding (InterPro:IPR001005), Homeodomain-like (InterPro:IPR009057), Myb, DNA-binding (InterPro:IPR014778), HTH transcriptional regu…	protein_coding
AT3G48830	AT3G48830.1	4.93502	9.25719e-07	polynucleotide adenylyltransferase family protein / RNA recognition motif (RRM)-containing protein; FUNCTIONS IN: polynucleotide adenylyltransferase activity, RNA binding, nucleotide binding, nucleic acid binding, nucleotidyltransferase activity; INVOLVED IN: RNA processing; LOCATED IN: endomembrane system; EXPRESSED IN: 12 plant structures; EXPRESSED DURING: 7 growth stages; CONTAINS InterPro DO…	protein_coding
